# Supplementary material for: Faster than expected Rubisco deactivation in shade reduces cowpea photosynthetic potential in variable light conditions
Source: PubMed Central journal article supplement (PMC8863576; doi:10.1038/s41477-021-01068-9), 2022-01-20
Supplement: 41477_2021_1068_MOESM1_ESM.pdf [file 41477_2021_1068_MOESM1_ESM.pdf]

---

**Supplementary information**

---

**Faster than expected Rubisco deactivation  
in shade reduces cowpea photosynthetic  
potential in variable light conditions**

---

In the format provided by the  
authors and unedited

Supplementary Materials for:

**Faster than expected Rubisco deactivation in shade reduces cowpea photosynthetic potential in variable light conditions**

Samuel H Taylor<sup>1,\*</sup>, Emmanuel Gonzalez-Escobar<sup>1,\*</sup>, Rhiannon Page<sup>1</sup>, Martin AJ Parry<sup>1</sup>, Stephen P Long<sup>1,2</sup>, Elizabete Carmo-Silva<sup>1</sup>

<sup>1</sup> Lancaster Environment Centre, Lancaster University, Lancaster, LA1 4YQ, UK

<sup>2</sup> Departments of Plant Biology and of Crop Sciences, Carl R. Woese Institute of Genomic Biology, University of Illinois, 1206 W. Gregory Dr., Urbana, IL 61801, USA

\* Authors contributed equally to this work.

Corresponding author. E-mail: e.carmosilva@lancaster.ac.uk

|                                                                                                                                                                              |    |
|------------------------------------------------------------------------------------------------------------------------------------------------------------------------------|----|
| Supplementary Methods.....                                                                                                                                                   | 2  |
| A/PPFD responses .....                                                                                                                                                       | 2  |
| A/c <sub>i</sub> responses .....                                                                                                                                             | 2  |
| Supplementary Tables.....                                                                                                                                                    | 4  |
| Table S1. List of abbreviations .....                                                                                                                                        | 4  |
| Table S2. Coefficients from Individual-by-individual models used as a starting point for mixed effects modelling of time-series for <i>S</i> .....                           | 5  |
| Table S3. Coefficients from Individual-by-individual models used as a starting point for mixed effects modelling of time-series for <i>V<sub>c,max</sub></i> .....           | 5  |
| Supplementary Figures .....                                                                                                                                                  | 6  |
| Fig. S1. Schematic of the lighting system .....                                                                                                                              | 6  |
| Fig. S2. Light responses for Rubisco activation state .....                                                                                                                  | 7  |
| Fig. S3. Comparison of leaf discs obtained from intact plants and assayed <i>in vitro</i> under greenhouse conditions.....                                                   | 8  |
| Fig. S4. Comparing methods for assaying Rubisco activities from cowpea leaf discs. ....                                                                                      | 9  |
| Fig. S5. The effect of 10 mM NaHCO <sub>3</sub> on Rubisco activation state in <i>Vigna</i> accession leaf discs incubated in 25 mM MES using the phenotyping light rig..... | 10 |
| Fig. S6. Plant status and leaf choice at time of sampling.....                                                                                                               | 11 |
| Fig. S7. Steady state A/c <sub>i</sub> responses .....                                                                                                                       | 12 |
| Fig. S8. Duration of Rubisco limitation.....                                                                                                                                 | 16 |
| Fig. S9. Sun-shade-sun responses for Rubisco activation state ( <i>S</i> ).....                                                                                              | 20 |
| Fig. S10. Induction (shade-sun) responses for one-point <i>V<sub>c,max</sub></i> .....                                                                                       | 24 |
| Fig. S11. A/PPFD responses .....                                                                                                                                             | 28 |
| References.....                                                                                                                                                              | 32 |

## Supplementary Methods

### A/PPFD responses

The relationship between A and incident PPFD was modelled as a non-rectangular hyperbola<sup>1,2</sup>:

$$A = \frac{\phi I + A_{\text{sat}} - \sqrt{(\phi I + A_{\text{sat}})^2 - 4\theta\phi I A_{\text{sat}}}}{2\theta} - R_d$$

Where:  $\phi$  is the apparent quantum yield ( $\text{mol mol}^{-1}$ );  $I$ , incident PPFD ( $\mu\text{mol m}^{-2} \text{s}^{-1}$ );  $A_{\text{sat}}$ , the maximum gross rate of leaf  $\text{CO}_2$  assimilation ( $\mu\text{mol m}^{-2} \text{s}^{-1}$ );  $\theta$ , a dimensionless curvature parameter; and  $R_d$ , day respiration ( $\mu\text{mol m}^{-2} \text{s}^{-1}$ ). Parameters were obtained using the optimiser function *optim* in R Language and Environment (v3.6.3<sup>3</sup>).

### A/ $c_i$ responses

The FvCB model<sup>4,5</sup> was used to characterise A/ $c_i$  relationships:

$$A = \min(W_C, W_J, W_P)(1 - \Gamma^*/c_c) - R_d$$

$$W_C = V_{c,\text{max}}c_c/(c_c + K_{CO})$$

$$W_J = Jc_c/(4c_c + 8\Gamma^*)$$

$$W_P = 3T_P c_c/(c_c - \Gamma^*)$$

where  $W_C$  is the Rubisco limited,  $W_J$  electron transport limited, and  $W_P$  triose-phosphate utilisation limited rate of carboxylation. The  $[\text{CO}_2]$  at the site of carboxylation in the chloroplast,  $c_c = c_i - A/g_m$ . Additional parameters are:  $\Gamma^*$ , the photosynthetic  $\text{CO}_2$  compensation point in the absence of  $R_d$ ;  $V_{c,\text{max}}$ , the maximum carboxylation rate of Rubisco;  $K_{CO} = K_C(1+O/K_O)$ , where  $K_C$  and  $K_O$  are the respective Michaelis constants for Rubisco catalysis of carboxylation and oxygenation reactions, and  $O$  is the partial pressure of  $\text{O}_2$ ;  $J$ , electron transport rate;  $T_P$ , the rate of triose phosphate utilisation.

With values for  $[\text{CO}_2]$  in partial pressure units, the match between  $c_i$  and  $W_C$ ,  $W_J$ , and  $W_P$  as limiting factors was identified using a previously published approach<sup>6,7</sup>. Values for  $V_{c,\text{max}}$ ,  $J$ , and  $T_P$  were fit using:

$$A = \frac{b - \sqrt{b^2 - 4c}}{2}$$

For  $A_C$ :

$$b = V_{c,\text{max}} - R_d + g_m(c_i + K_{CO})$$

$$c = g_m \left( V_{c,\text{max}}(c_i - \Gamma^*) - R_d(c_i + K_{CO}) \right)$$

For  $A_J$ :

$$b = J/4 - R_d + g_m(c_i + 2\Gamma^*)$$
$$c = g_m(J/4(c_i - \Gamma^*) - R_d(c_i + 2\Gamma^*))$$

For  $A_p$ :

$$b = 3T_p - R_d + g_m(c_i - \Gamma^*)$$
$$c = g_m(3T_p(c_i - \Gamma^*) - R_d(c_i - \Gamma^*))$$

For each  $A/c_i$  response, all possible limitation-state combinations were tested, respecting the required order of limitation states along the  $c_i$  axis ( $W_C < W_J < W_P$ ) and the minimum number of data necessary for each limitation state ( $n \geq 2$  when  $K_{CO}$  and  $\Gamma^*$  are fixed). The distribution-wise cost function was minimised using *optim*<sup>3</sup>, accepting the model with the lowest value after checking for admissibility and testing for co-limited ‘swinging points’<sup>6</sup>.

Preliminary fitting of different sets of parameters in the model showed that reasonable, positive, and non-zero estimates of  $R_d$  could be obtained by fixing  $g_m$  to  $5 \mu\text{mol m}^{-2} \text{s}^{-1} \text{Pa}^{-1}$  and using published temperature dependencies of  $\Gamma^*$ ,  $K_C$ , and  $K_O$  from tobacco<sup>8</sup>. The fit of limitation state assignments was validated qualitatively using the increase ( $W_C$ ), saturation ( $W_J$ ) and decrease ( $W_P$ ) in  $\Phi_{PSII}$  with  $c_i$ <sup>9</sup>. The effective quantum yield,  $\Phi_{PSII} = (F_m' - F_s)/F_m'$ , having been derived from background ( $F_s$ ) and maximum ( $F_m'$ ) fluorescence yields obtained with a multiphase flash using the integrated fluorometer in the LI-6800F cuvette.

## Supplementary Tables

Table S1. List of abbreviations

|               |                                                                                                                                          |
|---------------|------------------------------------------------------------------------------------------------------------------------------------------|
| 3-PGA         | 3-phosphoglycerate                                                                                                                       |
| $A$           | net CO <sub>2</sub> assimilation rate                                                                                                    |
| $a$           | binary coefficient for piecewise model of sun-shade-sun response by Rubisco activation state                                             |
| $A_f$         | foregone assimilation (diurnal)                                                                                                          |
| $A_F$         | net CO <sub>2</sub> assimilation rate at a final PPFD (for a timestep in diurnal model)                                                  |
| $A_i$         | net CO <sub>2</sub> assimilation rate at an initial PPFD (for a timestep in diurnal model)                                               |
| $A_Q$         | integrated net CO <sub>2</sub> assimilation (for a timestep in diurnal model) as an instantaneous response to PPFD, i.e. ignoring $\tau$ |
| $A_R$         | Rubisco limited net CO <sub>2</sub> assimilation rate                                                                                    |
| $A_{sat}$     | light saturated net CO <sub>2</sub> assimilation rate in the A/PPFD relationship modelled as a non-rectangular hyperbola                 |
| $A_\tau$      | integrated net CO <sub>2</sub> assimilation (for a timestep in diurnal model), accounting for $\tau$                                     |
| $b$           | binary coefficient for piecewise model of sun-shade-sun response by Rubisco activation state                                             |
| $c$           | binary coefficient for piecewise model of sun-shade-sun response by Rubisco activation state                                             |
| $g_m$         | mesophyll conductance (to CO <sub>2</sub> )                                                                                              |
| $I$           | irradiance, as PPFD, in the A/PPFD relationship modelled as a non-rectangular hyperbola                                                  |
| $K_C$         | Michaelis-Menten coefficient for Rubisco carboxylation                                                                                   |
| $K_O$         | Michaelis-Menten coefficient for Rubisco oxygenation                                                                                     |
| $O$           | atmospheric concentration of O <sub>2</sub>                                                                                              |
| PMSF          | phenylmethylsulphonyl fluoride                                                                                                           |
| PPFD          | photosynthetic photon flux density                                                                                                       |
| Rca           | Rubisco activase                                                                                                                         |
| $R_d$         | respiration in the light                                                                                                                 |
| RuBP          | ribulose-1,5-bisphosphate                                                                                                                |
| $S$           | Rubisco activation state, $V_i/V_t$                                                                                                      |
| $S_H$         | steady-state Rubisco activation state at high light (sun)                                                                                |
| $S_L$         | steady-state Rubisco activation state at low light (shade)                                                                               |
| $t$           | time                                                                                                                                     |
| $t_L$         | the duration of low light (shade) affecting Rubisco activation state                                                                     |
| $V_i$         | Rubisco initial activity measured <i>in vitro</i>                                                                                        |
| $V_t$         | Rubisco total activity measured <i>in vitro</i>                                                                                          |
| $V_{c,max}$   | gas exchange estimate of the rate of carboxylation by Rubisco                                                                            |
| $V_{c,max,H}$ | asymptotic value of maximum Rubisco carboxylation rate in high light (sun) following induction                                           |
| $V_{c,max,L}$ | maximum Rubisco carboxylation rate after 20 min low light (shade) prior to induction                                                     |
| $\Gamma^*$    | CO <sub>2</sub> compensation point in the absence of $R_d$                                                                               |
| $\theta$      | non-dimensional curvature parameter in the A/PPFD relationship modelled as a non-rectangular hyperbola                                   |
| $\tau$        | a half time                                                                                                                              |
| $\tau_a$      | half-time for activation of Rubisco                                                                                                      |
| $\tau_{a,S}$  | half-time for activation of Rubisco based on Rubisco activation state ( $S$ )                                                            |
| $\tau_{a,V}$  | half-time for activation of Rubisco based on gas exchange estimates of maximum Rubisco carboxylation rate ( $V_{c,max}$ )                |
| $\tau_d$      | half-time for deactivation of Rubisco                                                                                                    |
| $\tau_{d,S}$  | half-time for deactivation of Rubisco based on Rubisco activation state ( $S$ )                                                          |
| $\tau_{d,V}$  | half-time for deactivation of Rubisco based on gas exchange estimates of maximum Rubisco carboxylation rate ( $V_{c,max}$ )              |
| $\varphi$     | initial slope of the A/PPFD relationship modelled as a non-rectangular hyperbola                                                         |

**Table S2. Coefficients from Individual-by-individual models used as a starting point for mixed effects modelling of time-series for S**

| Sample                                                                                       | $S_L$ (%) | $S_H$ (%) | $\tau_{d,S}$ (s) | $\tau_{a,S}$ (s) |
|----------------------------------------------------------------------------------------------|-----------|-----------|------------------|------------------|
| <i>V. adenantha</i> _A                                                                       | 61.17806  | 79.05034  | 20.000072        | 207.82914        |
| <i>V. adenantha</i> _C                                                                       | 60.09176  | 81.64326  | 181.421458       | 100.53259        |
| <i>V. adenantha</i> _D                                                                       | 58.97032  | 85.42016  | 229.449731       | 455.91706        |
| <i>V. sp. Savi</i> _A                                                                        | 54.82047  | 63.65896  | 6.455822         | 39.59381         |
| <i>V. sp. Savi</i> _B                                                                        | 54.36652  | 61.62611  | 8.915565         | 137.31111        |
| <i>V. sp. Savi</i> _C                                                                        | 55.20694  | 69.95726  | 52.927607        | 216.83621        |
| <i>V. sp. Savi</i> _D                                                                        | 47.78410  | 67.81300  | 61.956361        | 166.24391        |
| IT82E-16_B                                                                                   | 57.14931  | 69.37678  | 265.740942       | 107.12442        |
| IT82E-16_C                                                                                   | 49.60266  | 73.21978  | 102.549414       | 145.01491        |
| IT82E-16_D                                                                                   | 53.20158  | 69.65418  | 160.822643       | 161.09552        |
| IT86D-1010_A                                                                                 | 59.68661  | 79.93667  | 65.382802        | 113.33060        |
| IT86D-1010_B                                                                                 | 57.60660  | 80.13056  | 23.677550        | 137.39551        |
| IT86D-1010_C                                                                                 | 61.16164  | 79.58986  | 19.390893        | 142.53163        |
| IT86D-1010_D                                                                                 | 53.79355  | 80.79573  | 70.550586        | 106.86711        |
| *Letter coding alongside genotype names indicates experimental blocks (not used in analysis) |           |           |                  |                  |

**Table S3. Coefficients from Individual-by-individual models used as a starting point for mixed effects modelling of time-series for  $V_{c,max}$** 

| Sample*                                                                                       | $V_{c,max,L}$ (%) | $V_{c,max,H}$ (%) | $\tau_{a,V}$ (s) |
|-----------------------------------------------------------------------------------------------|-------------------|-------------------|------------------|
| <i>V. adenantha</i> _2                                                                        | 42.54193          | 151.4440          | 95.13726         |
| <i>V. adenantha</i> _5                                                                        | 110.96318         | 273.3067          | 185.23528        |
| <i>V. adenantha</i> _6                                                                        | 130.85351         | 282.7727          | 350.97213        |
| <i>V. adenantha</i> _9                                                                        | 97.49639          | 278.2085          | 184.21776        |
| <i>V. sp. Savi</i> _1                                                                         | 78.96409          | 197.2805          | 113.80807        |
| <i>V. sp. Savi</i> _2                                                                         | 77.20333          | 172.1294          | 174.78790        |
| <i>V. sp. Savi</i> _5                                                                         | 70.40896          | 316.6256          | 91.00129         |
| <i>V. sp. Savi</i> _6                                                                         | 117.72291         | 210.1258          | 183.68795        |
| <i>V. sp. Savi</i> _8                                                                         | 23.57169          | 234.5373          | 98.92535         |
| <i>V. sp. Savi</i> _9                                                                         | 126.77560         | 294.3917          | 213.21886        |
| IT82E-16_1                                                                                    | 102.86741         | 219.1356          | 161.29920        |
| IT82E-16_2                                                                                    | 142.55706         | 309.3509          | 824.59265        |
| IT82E-16_5                                                                                    | 141.38060         | 260.1907          | 201.56364        |
| IT82E-16_6                                                                                    | 146.07970         | 299.8841          | 155.52270        |
| IT82E-16_8                                                                                    | 61.07451          | 176.2086          | 104.30483        |
| IT82E-16_9                                                                                    | 88.36712          | 221.0774          | 100.91744        |
| IT86D-1010_1                                                                                  | 93.01146          | 243.2872          | 147.46197        |
| IT86D-1010_6                                                                                  | 167.34697         | 306.9400          | 390.30264        |
| IT86D-1010_8                                                                                  | 107.40724         | 257.4983          | 215.76208        |
| IT86D-1010_5                                                                                  | 106.87984         | 179.2362          | 150.68602        |
| * Number coding alongside genotype names indicates experimental blocks (not used in analysis) |                   |                   |                  |

## Supplementary Figures

### Fig. S1. Schematic of the lighting system

Artificial sunlight simulation rig schematic (A) and in operation (B) for phenotyping diversity in Rubisco activity and activation using a modified leaf disc method approach. Two lab-jacks allow re-positioning of the water bath to achieve varying light intensities. Freshly excised leaf discs in 50 mL beakers containing 25 mM MES pH 5.5 are exposed to specific PPFD and temperature conditions prior to sampling. Easy access to liquid nitrogen dewar allows rapid snap-freezing of leaf discs after collection from assay beakers.

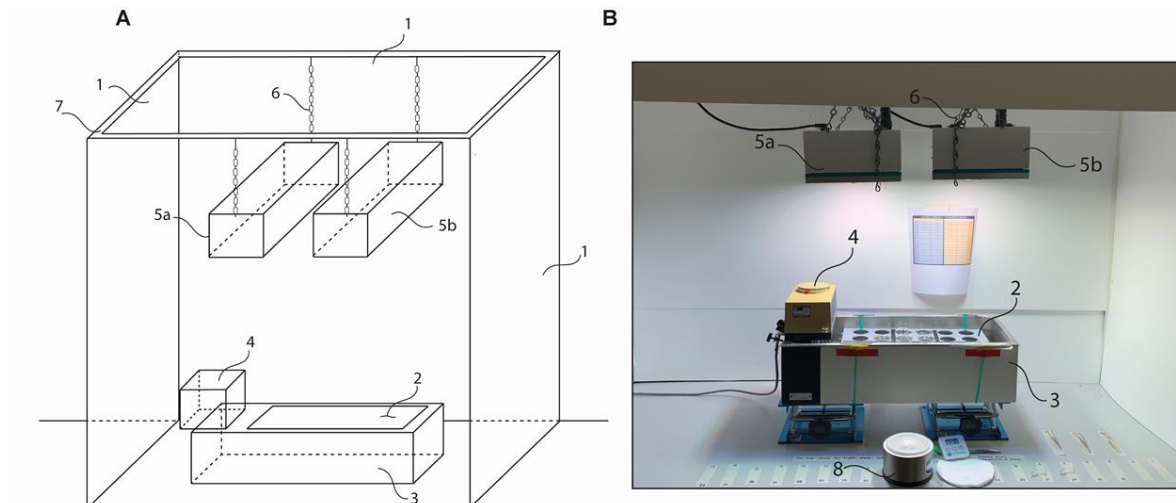

**1**, reflective shielding; **2**, rack to hold 50 mL beakers; **3**, water bath; **4**, temperature controlled water bath heater; **5**, LED growth lights; **6**, chains to hold the LED lights; **7**, metal structural support beam; **8**, liquid nitrogen dewar for snap-freezing leaf discs.

**Fig. S2. Light responses for Rubisco activation state**

Light response curves from *Vigna* accessions following changes in Rubisco activation at 30 °C (main document Methods) with increasing light intensity, using the light-rig. Cowpea (*V. unguiculata*) accessions (a) IT86D-1010 and (b) IT82E-16; cowpea wild relatives (c) *V. sp. Savi.* (TVNu-1948) and (d) wild pea *V. adenantha*. Shading indicates the standard error of the mean around the loess regression trendline.

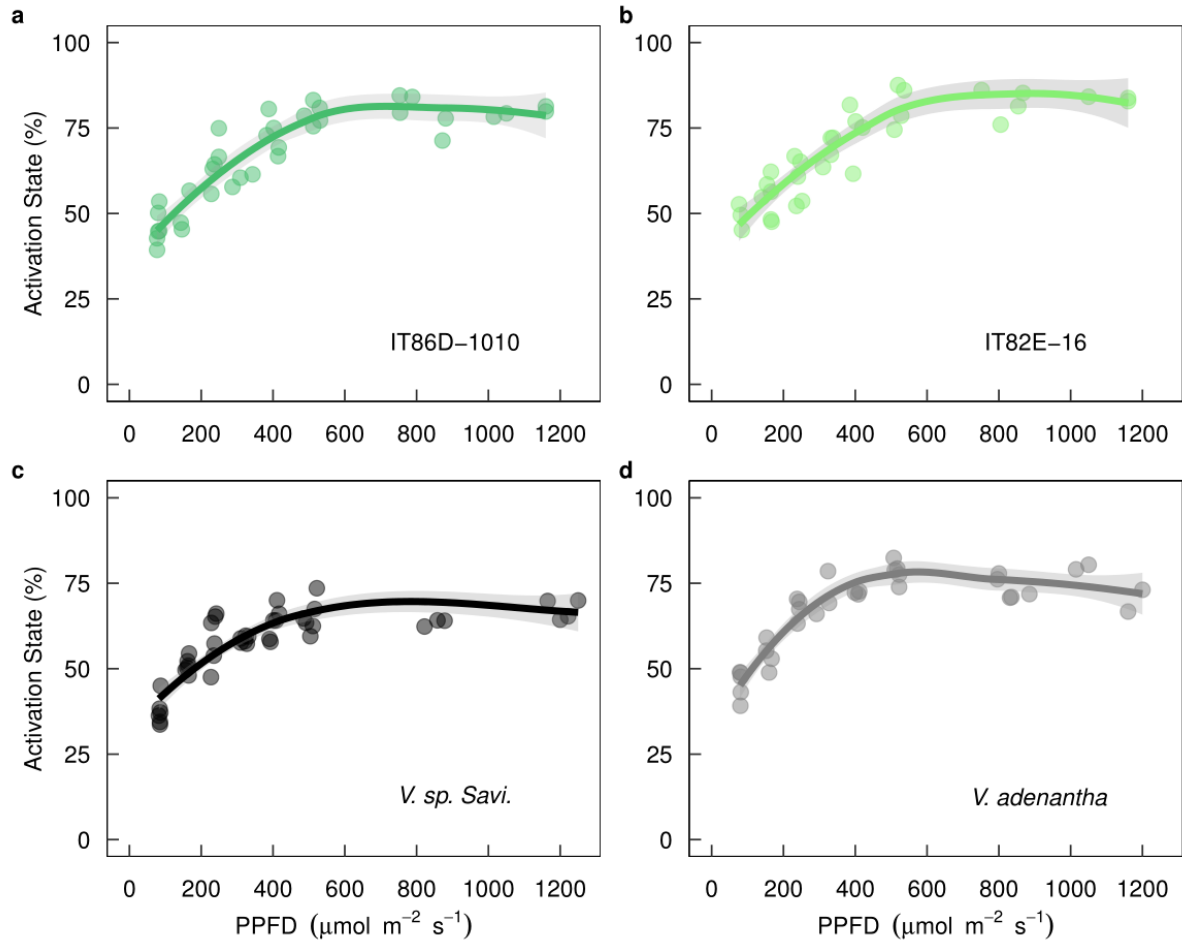



**Fig. S3. Comparison of leaf discs obtained from intact plants and assayed *in vitro* under greenhouse conditions.**

Rubisco activation state (a), initial (b) and total (c) activities (main document Methods) were measured at 30 °C from leaf discs of cowpea accession IT86D-1010. These were either directly frozen from 3.5-weeks old intact plants grown at  $400 \mu\text{mol m}^{-2} \text{s}^{-1}$ , or frozen after 60 min flotation at the same light intensity in greenhouse conditions, using either a solution of 25 mM MES-NaOH, pH 5.5, or using distilled water, pH 7 for 60 min. Replicates were excised from terminal and lateral leaflets of the 2<sup>nd</sup> fully expanded trifoliolate leaf of four individual plants. Material used in different test conditions originated from the same plant. There were no significant differences between test conditions (bold letters, one-way ANOVA,  $P > 0.05$ ). Boxplots indicate medians, 25<sup>th</sup> & 75<sup>th</sup> percentile and, where relevant, whiskers indicate values falling within  $1.5 \times$  the interquartile range. All Individual data are also plotted as points.

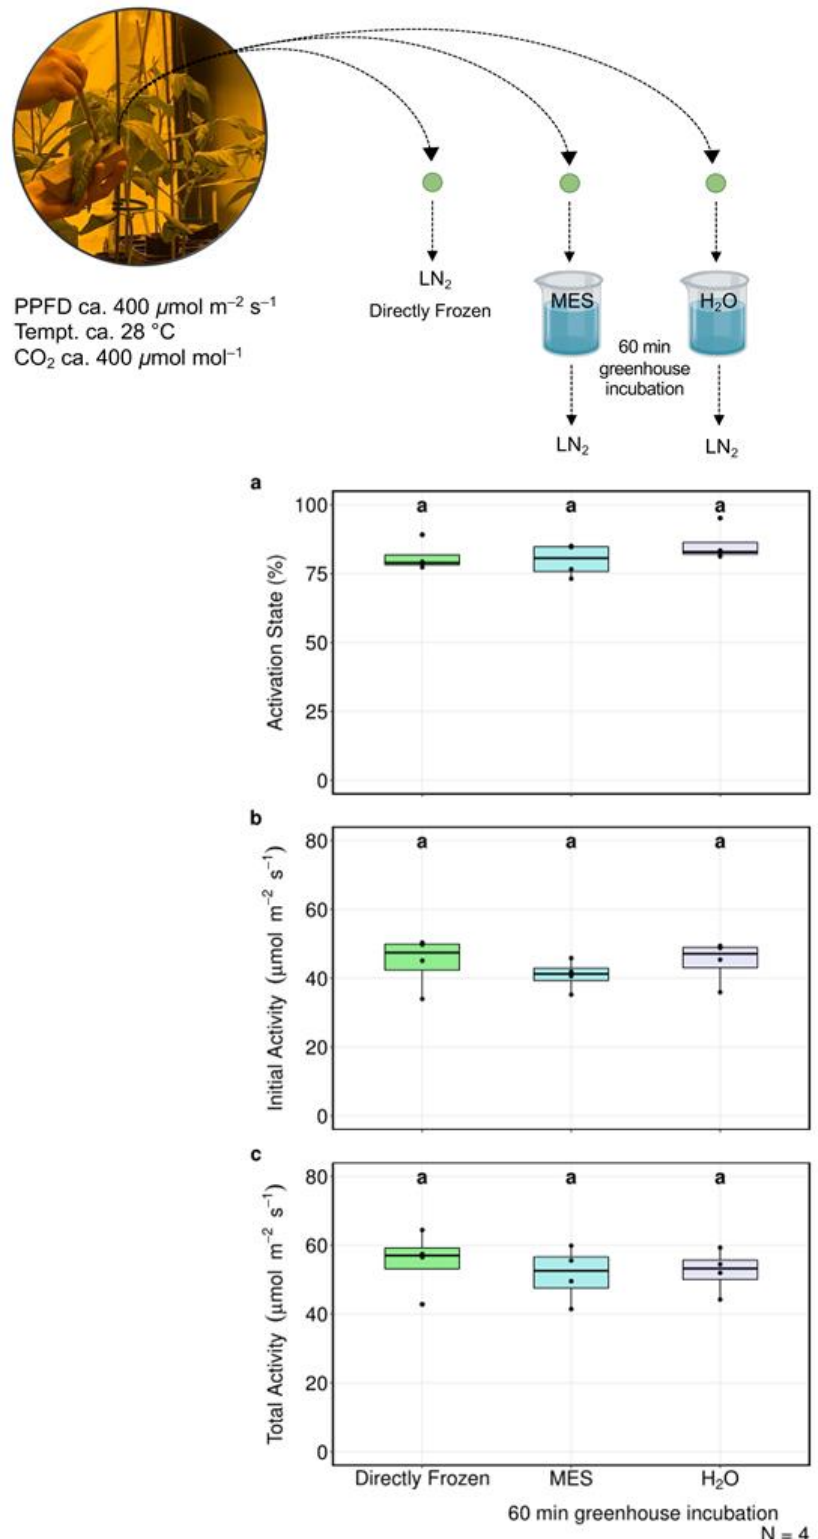

**Fig. S4. Comparing methods for assaying Rubisco activities from cowpea leaf discs.**

Rubisco activation state (a), initial (b) and total (c) activities (main document Methods) were determined at 30 °C. Leaf discs samples from cowpea accession IT86D-1010 were incubated in 25 mM MES buffer in the light-rig for 20, 40 and 60 min at 500  $\mu\text{mol m}^{-2} \text{s}^{-1}$ . Letters indicate the results of a one-way ANOVA: Rubisco Activation State was lower with only 20 min incubation (40 min  $P = 0.07$ ; 60 min  $P = 0.018$ ), but there were no significant differences in Activity across the three incubation times. Boxplot statistics as Fig. S3.

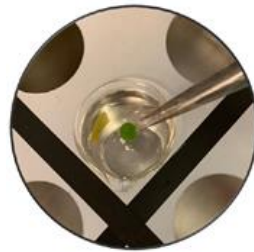

PPFD ca. 500  $\mu\text{mol m}^{-2} \text{s}^{-1}$   
 Tempt. 30 °C  
 CO<sub>2</sub> ca. 400  $\mu\text{mol mol}^{-1}$

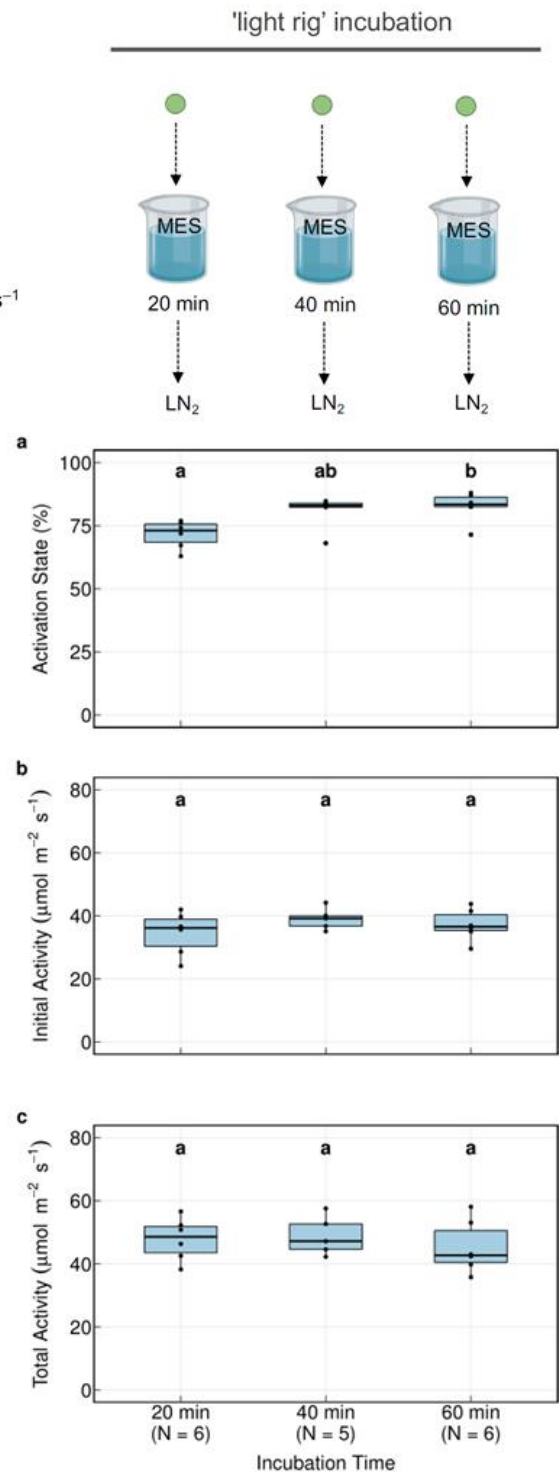

**Fig. S5. The effect of 10 mM NaHCO<sub>3</sub> on Rubisco activation state in *Vigna* accession leaf discs incubated in 25 mM MES using the phenotyping light rig.**

Rubisco activation states at 30 °C (main document Methods) from two cowpea (IT86D-1010 and IT82E-16) and wild pea accessions (*V. adenantha*, *V. sp. Savi*) were obtained after incubation with and without the addition of 10 mM NaHCO<sub>3</sub>, after 40 and 80 min incubation at 1000  $\mu\text{mol m}^{-2} \text{s}^{-1}$  using the light-rig. A repeated measures three-way ANOVA comparing incubation time and NaHCO<sub>3</sub> concentration by accession, found no significant differences between buffer types after 80 min incubation, irrespective of accession. The same was true when using 40 min incubation time, for all accessions but *V. adenantha*, leaf discs of which showed significantly lower activation state in MES than with addition of NaHCO<sub>3</sub>. Boxplot statistics as Fig. S3.

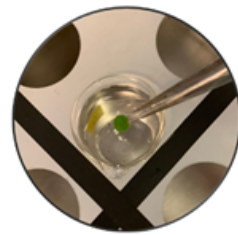

PPFD 1000  $\mu\text{mol m}^{-2} \text{s}^{-1}$   
 Tempt. 30 °C  
 CO<sub>2</sub> ca. 400  $\mu\text{mol mol}^{-1}$

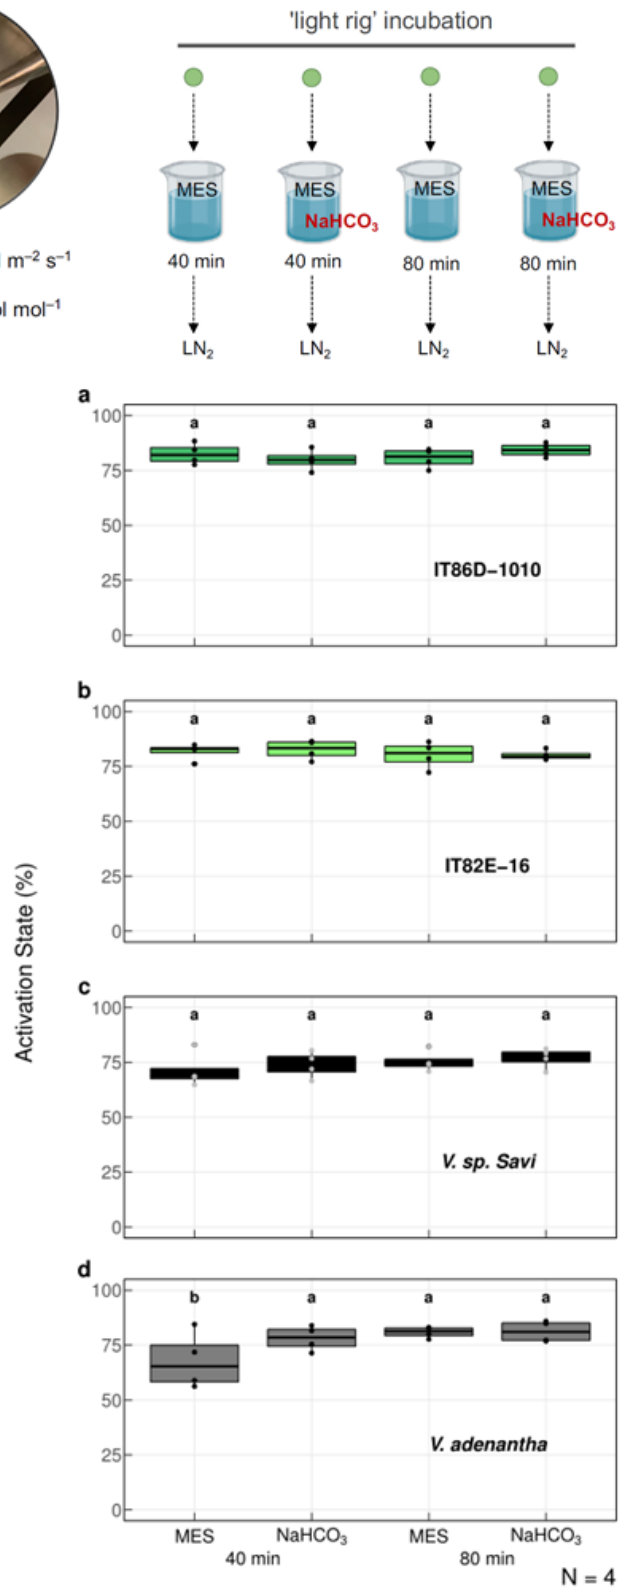

**Fig. S6. Plant status and leaf choice at time of sampling**

Measurements were carried out on fully expanded leaves 3-4 weeks after planting, at which stage the youngest fully expanded leaves were the first or second true leaves. Leaf expansion was judged based on colour and texture, with leaves judged to be fully expanded once they were dark green and glossy, an appearance that matched that of older leaves but not younger, expanding foliage.

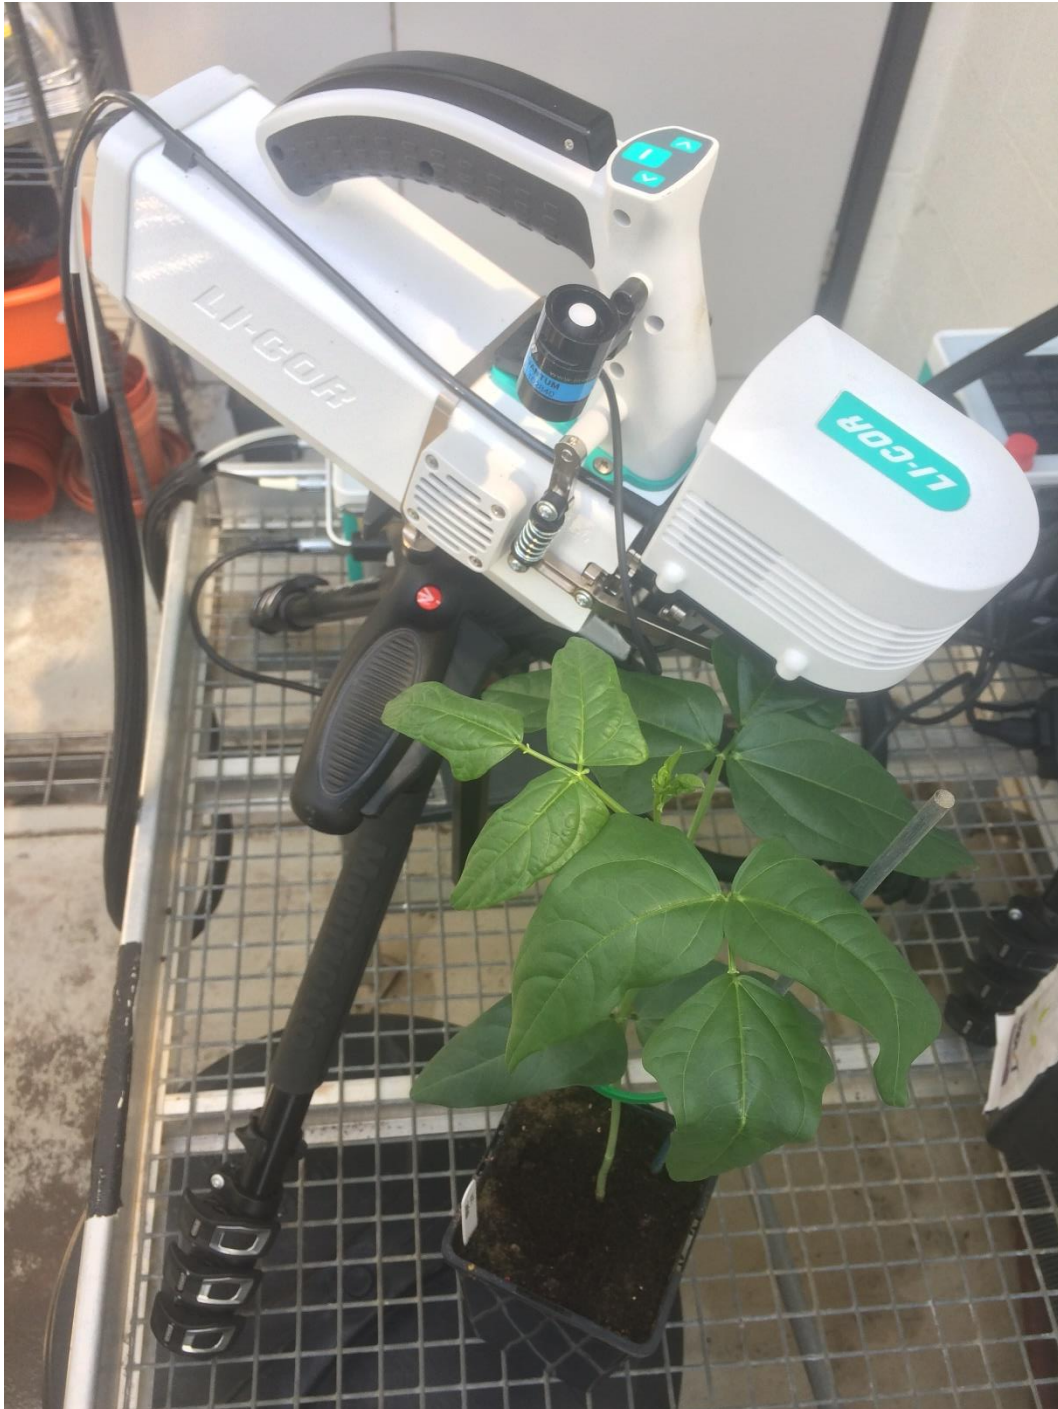

**Fig. S7. Steady state  $A/c_i$  responses**

See Supplementary Methods for details. Overplotted red symbols indicate the steady state operating point. Individuals coded as in Table S3.

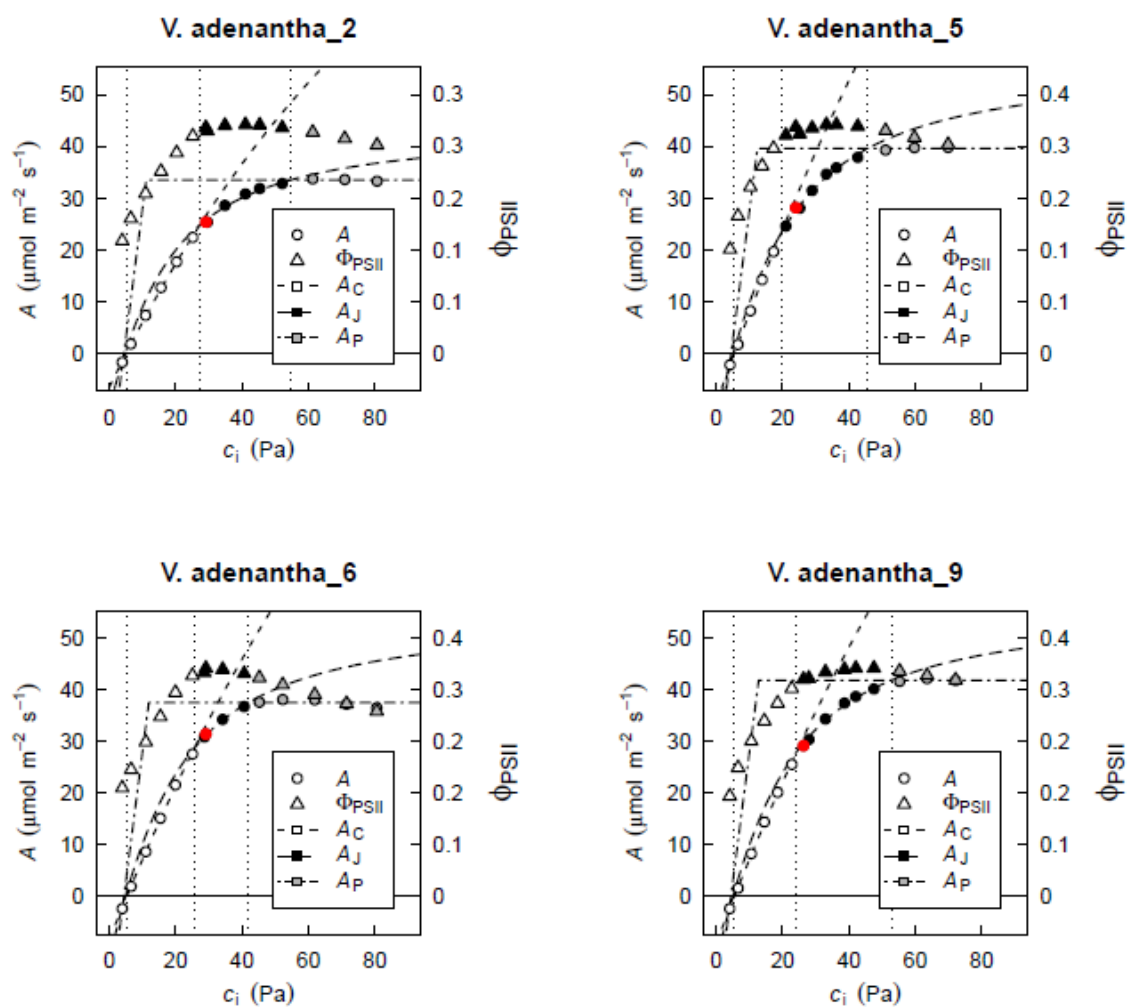

Fig. S7 continued.

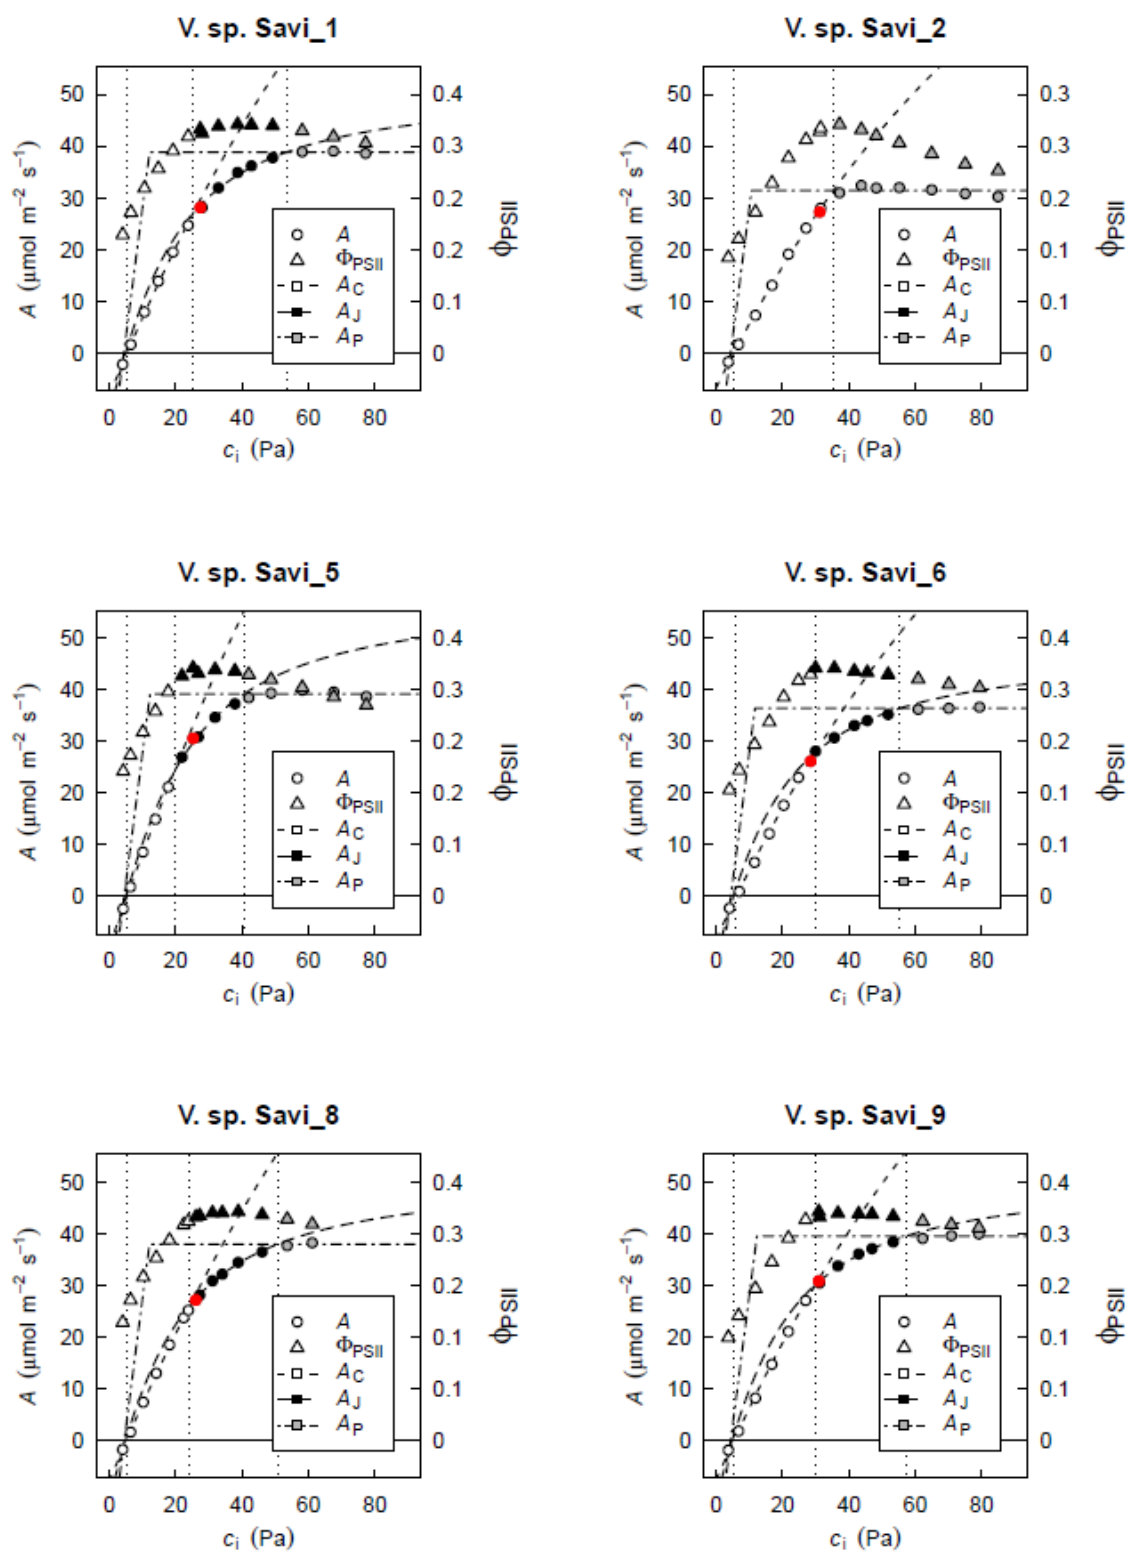

Fig. S7 continued.

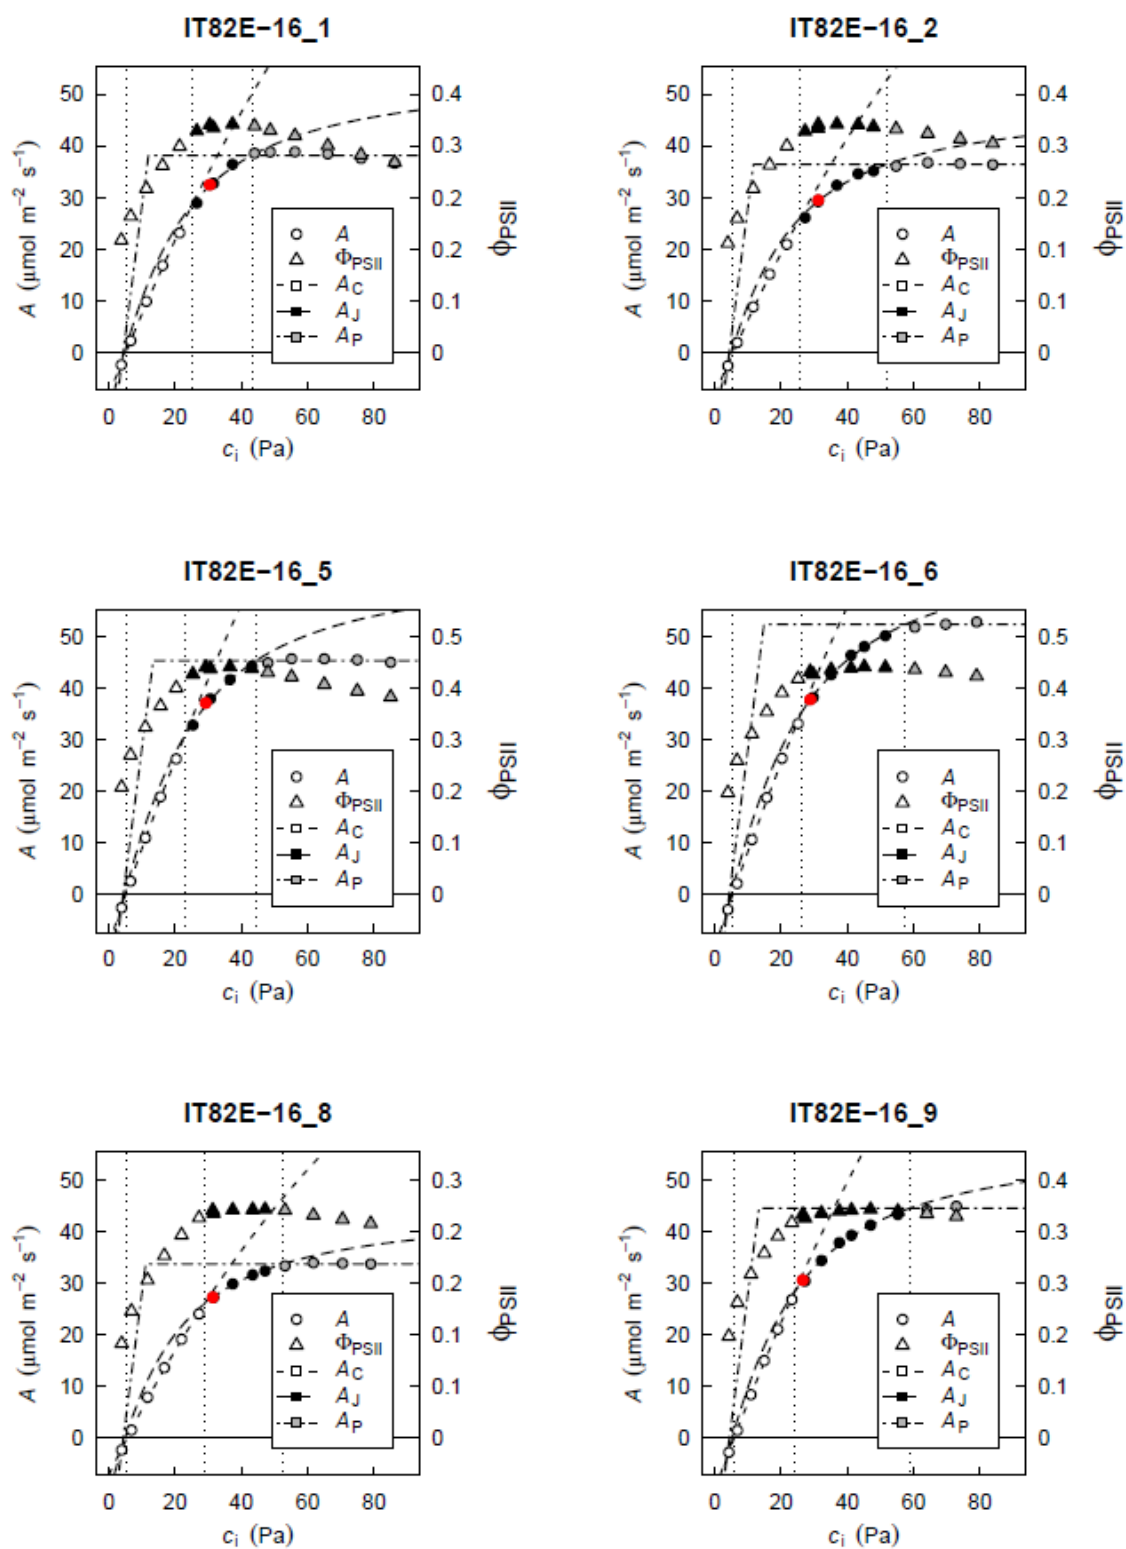

Fig. S7 continued.

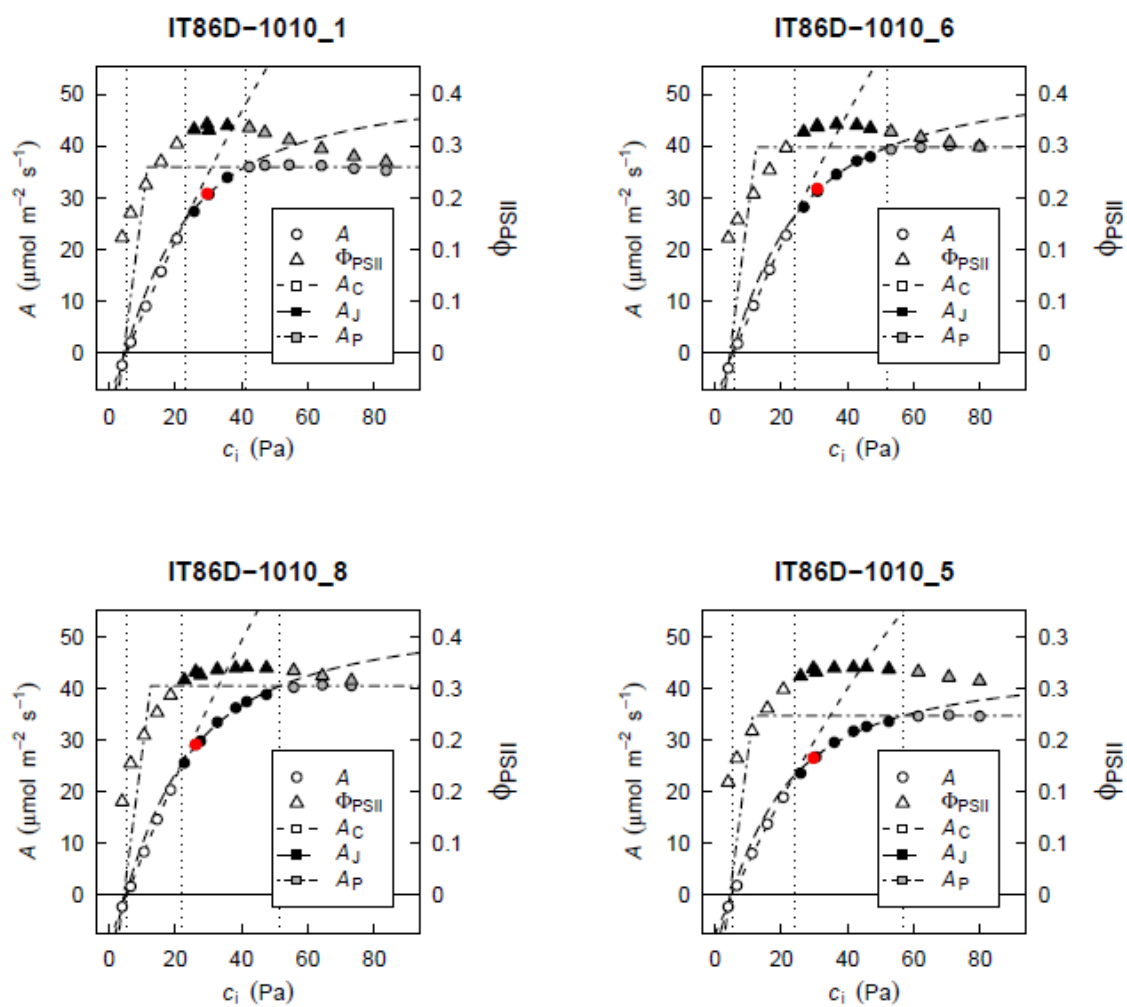



**Fig. S8. Duration of Rubisco limitation**

The duration of Rubisco limitation was assessed based on intersection between net CO<sub>2</sub> assimilation (*A*, black line) and potential RuBP-regeneration limited net CO<sub>2</sub> assimilation predicted from *c<sub>i</sub>* using parameters from steady-state *A/c<sub>i</sub>* responses (*A<sub>J</sub>*, red line). Transparent lines show complete timeseries; overplotted solid lines show segments used in modelling (Fig. S10). Vertical dashed lines indicate 5 min induction. Individuals coded as in Table S3; *A<sub>J</sub>* is not provided for *V. sp. Savi\_2*, consistent with its steady state *A/c<sub>i</sub>* (Fig. S7).

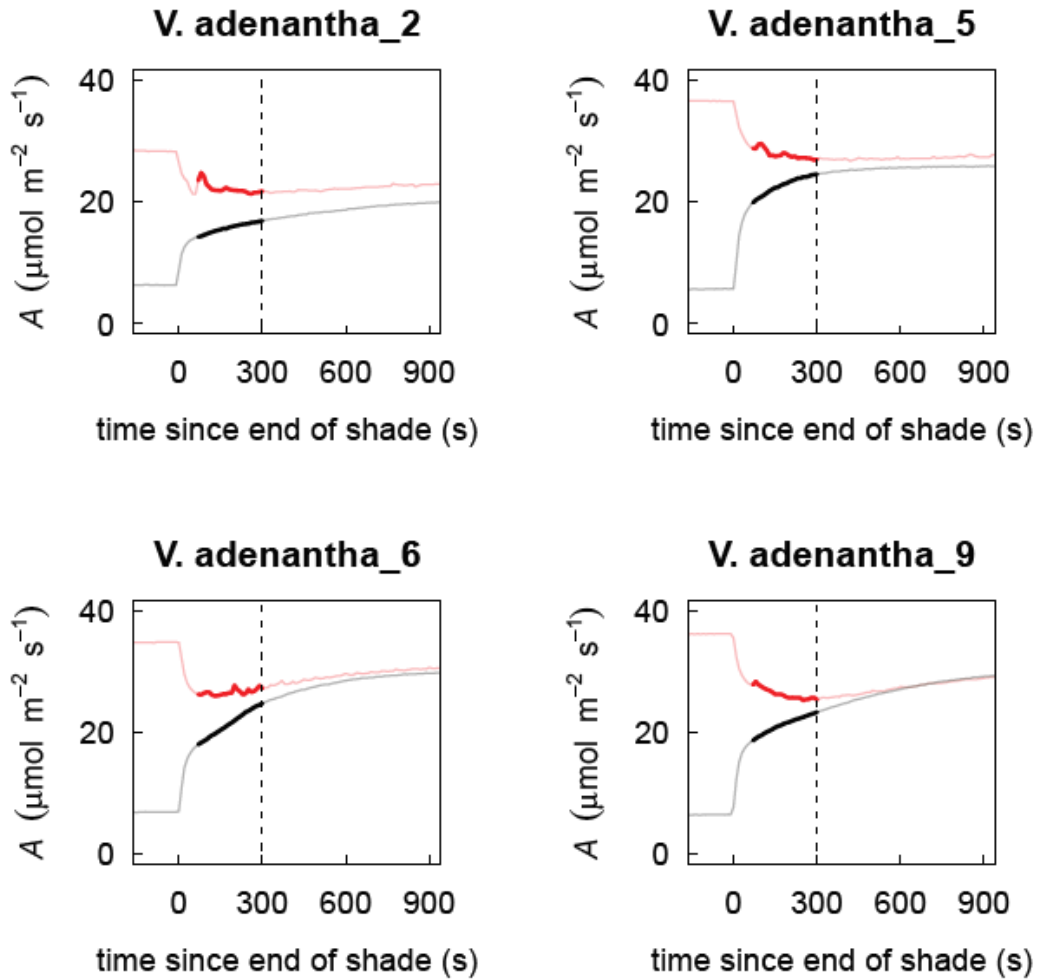

Fig. S8 continued.

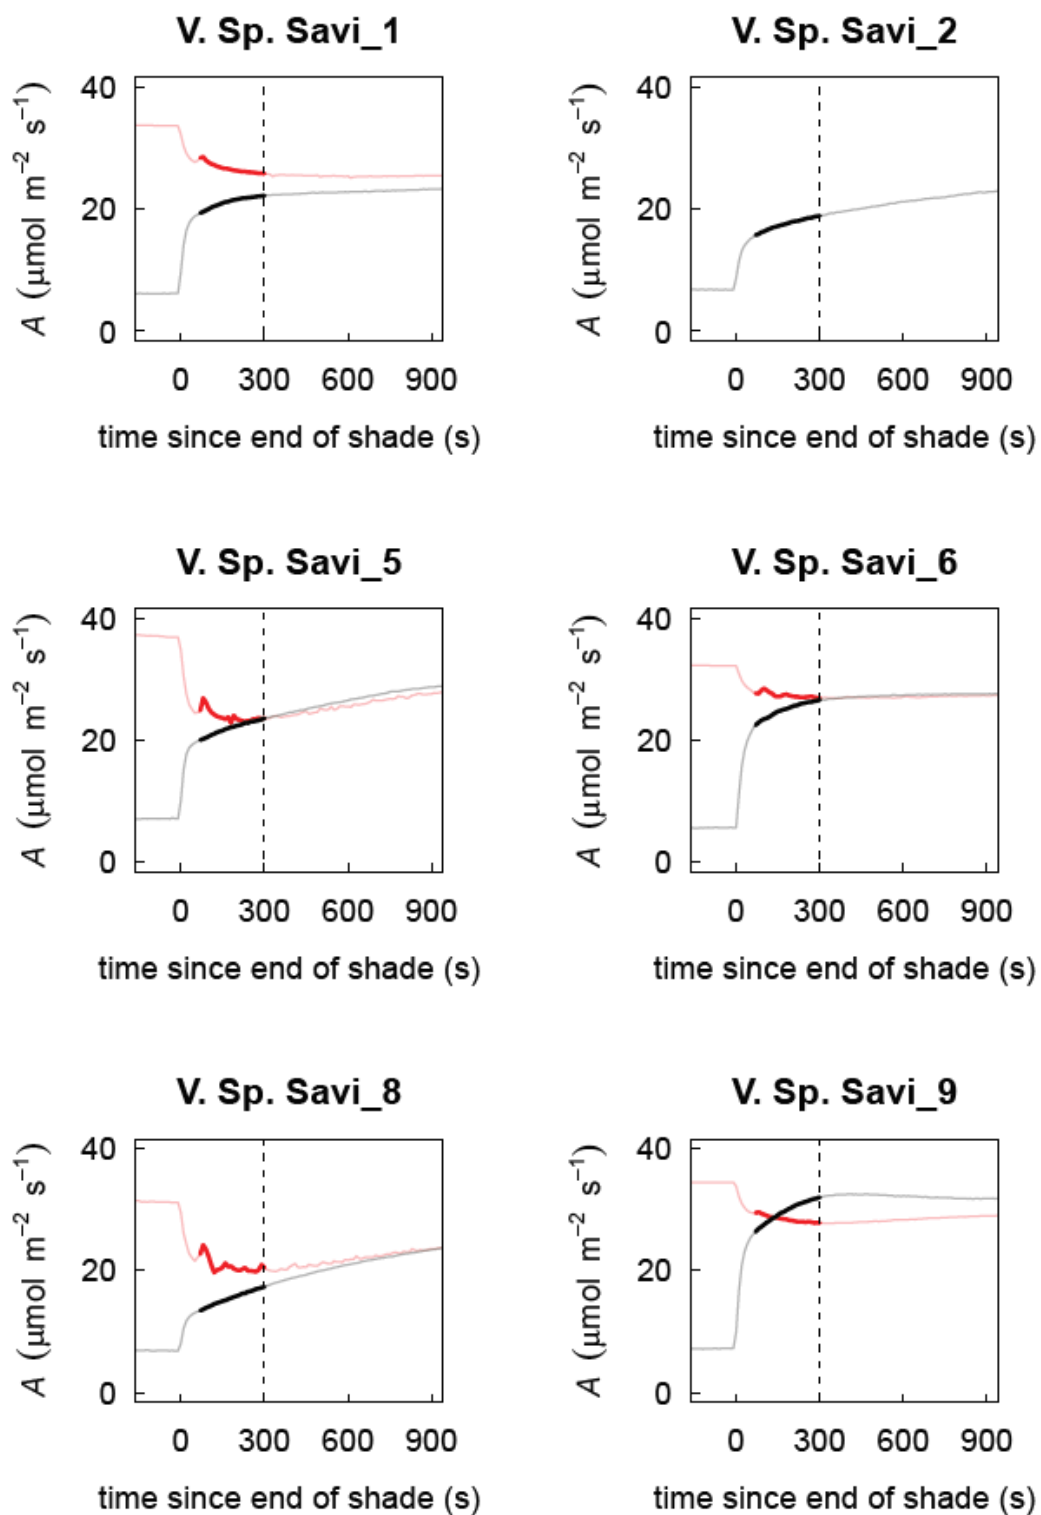

Fig. S8 continued.

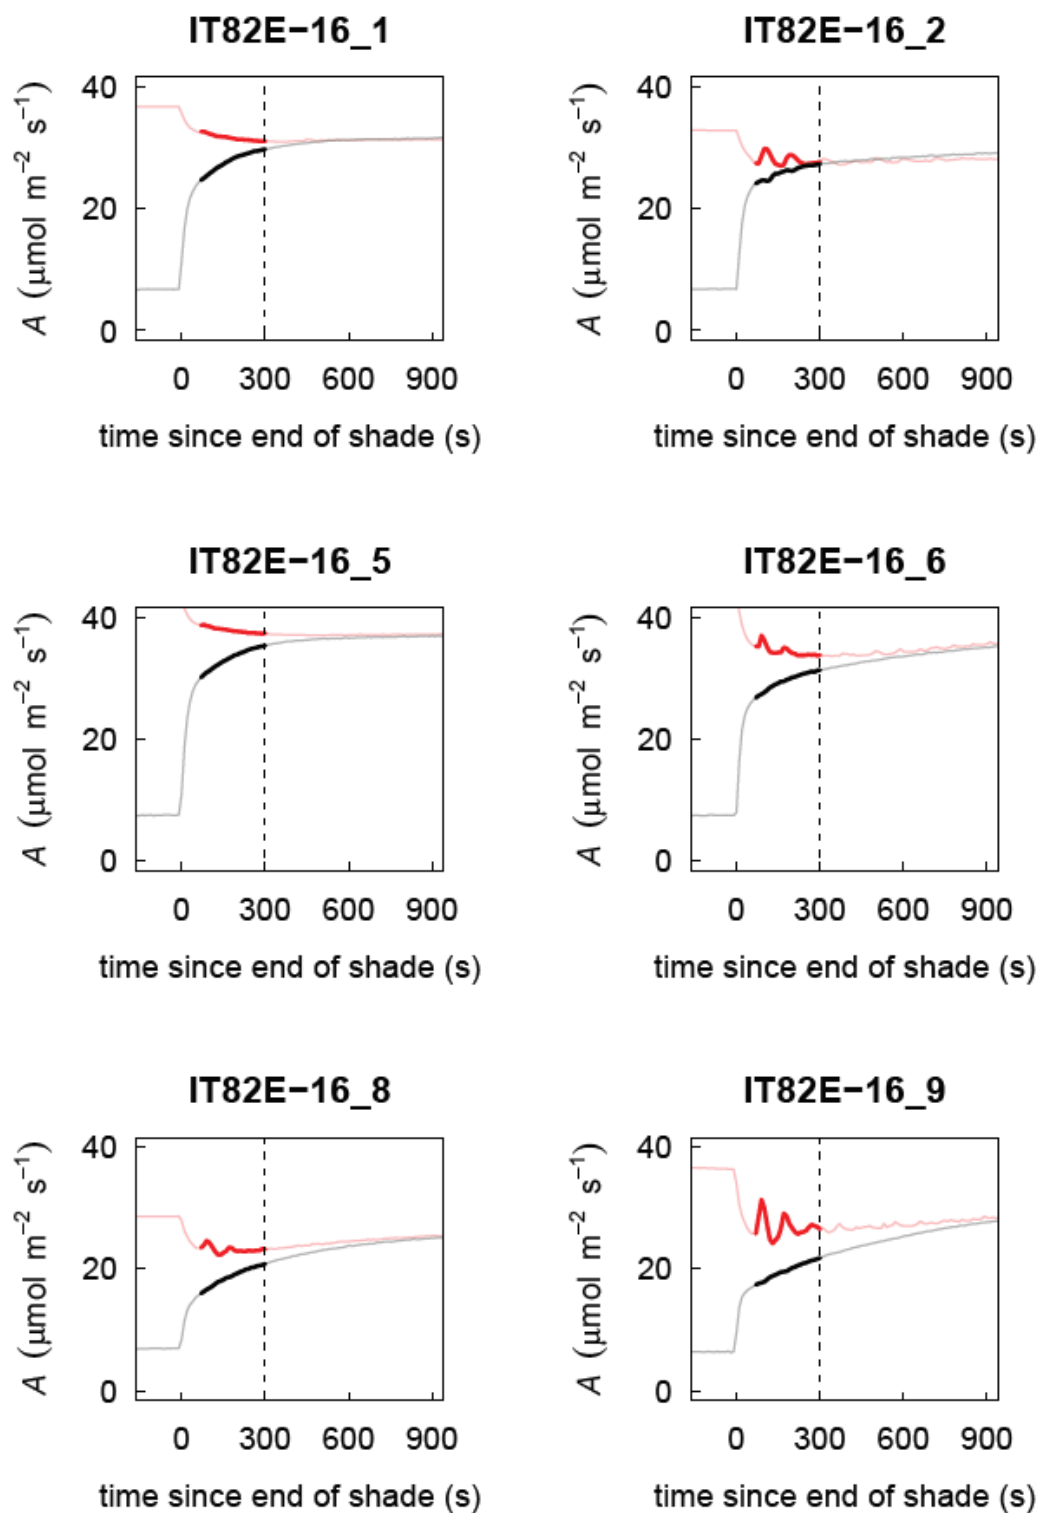

Fig. S8 continued.

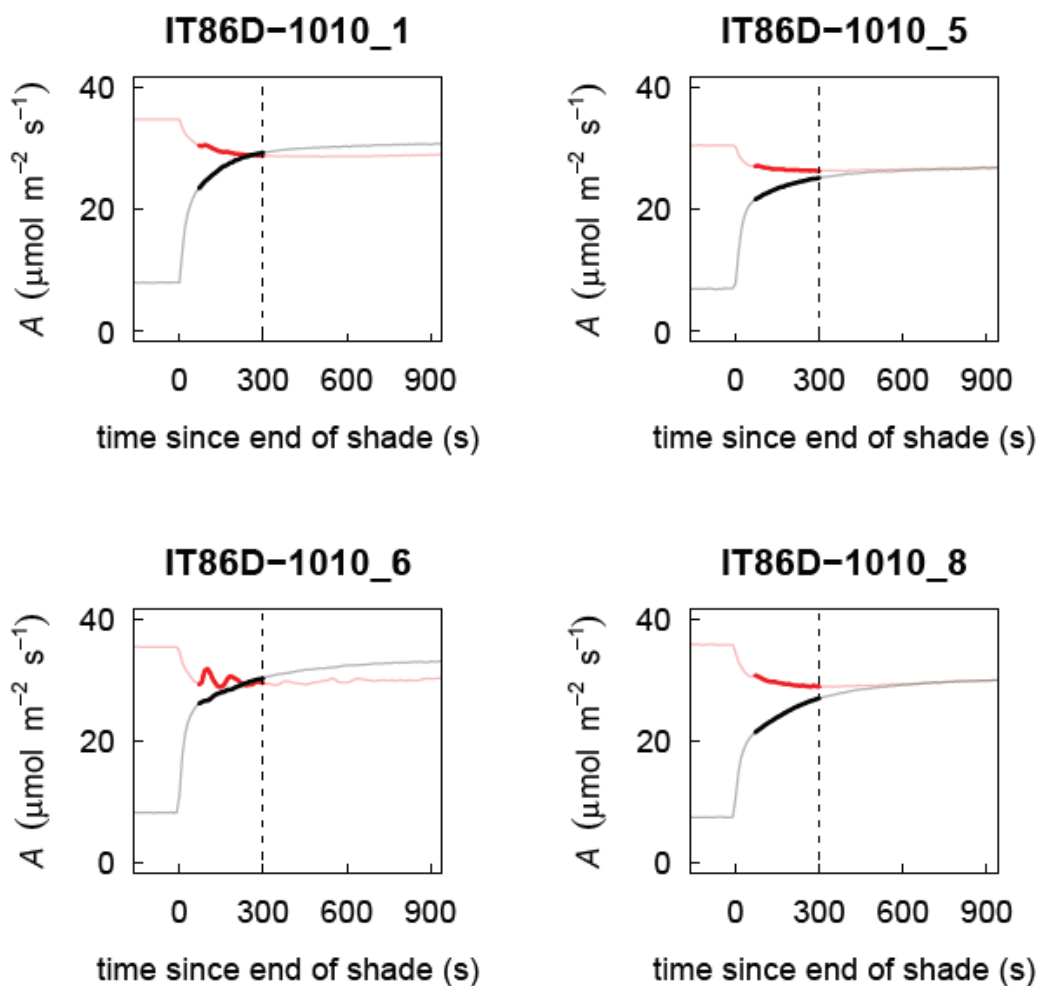

**Fig. S9. Sun-shade-sun responses for Rubisco activation state (S)**

Individual replicates are plotted, with overlaid best-fit models at the levels of: genotypes, solid lines; individuals, dashed lines. Individuals coded as in Table S2.

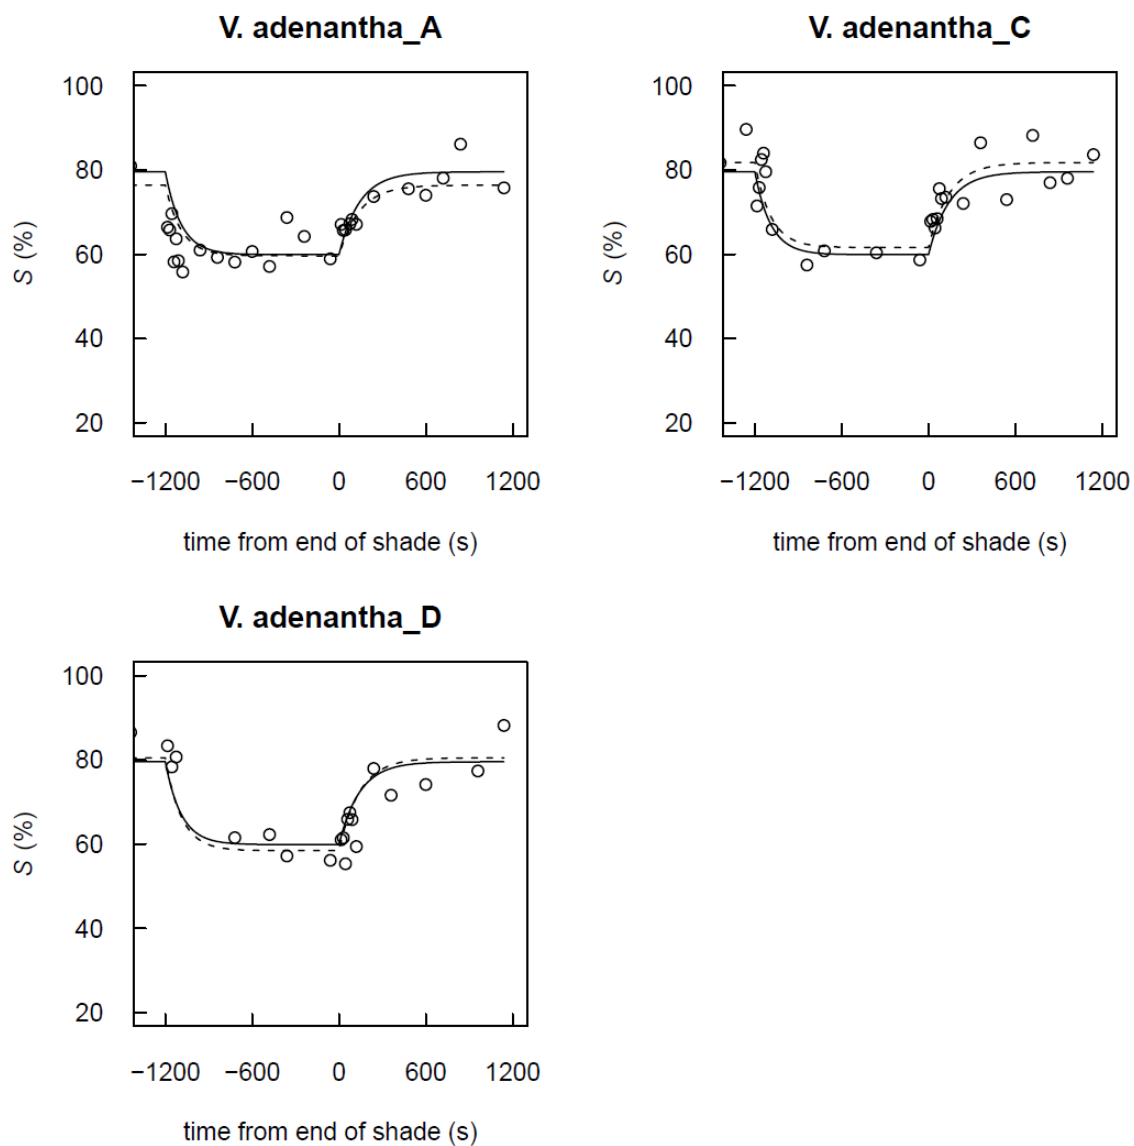

Fig. S9 continued.

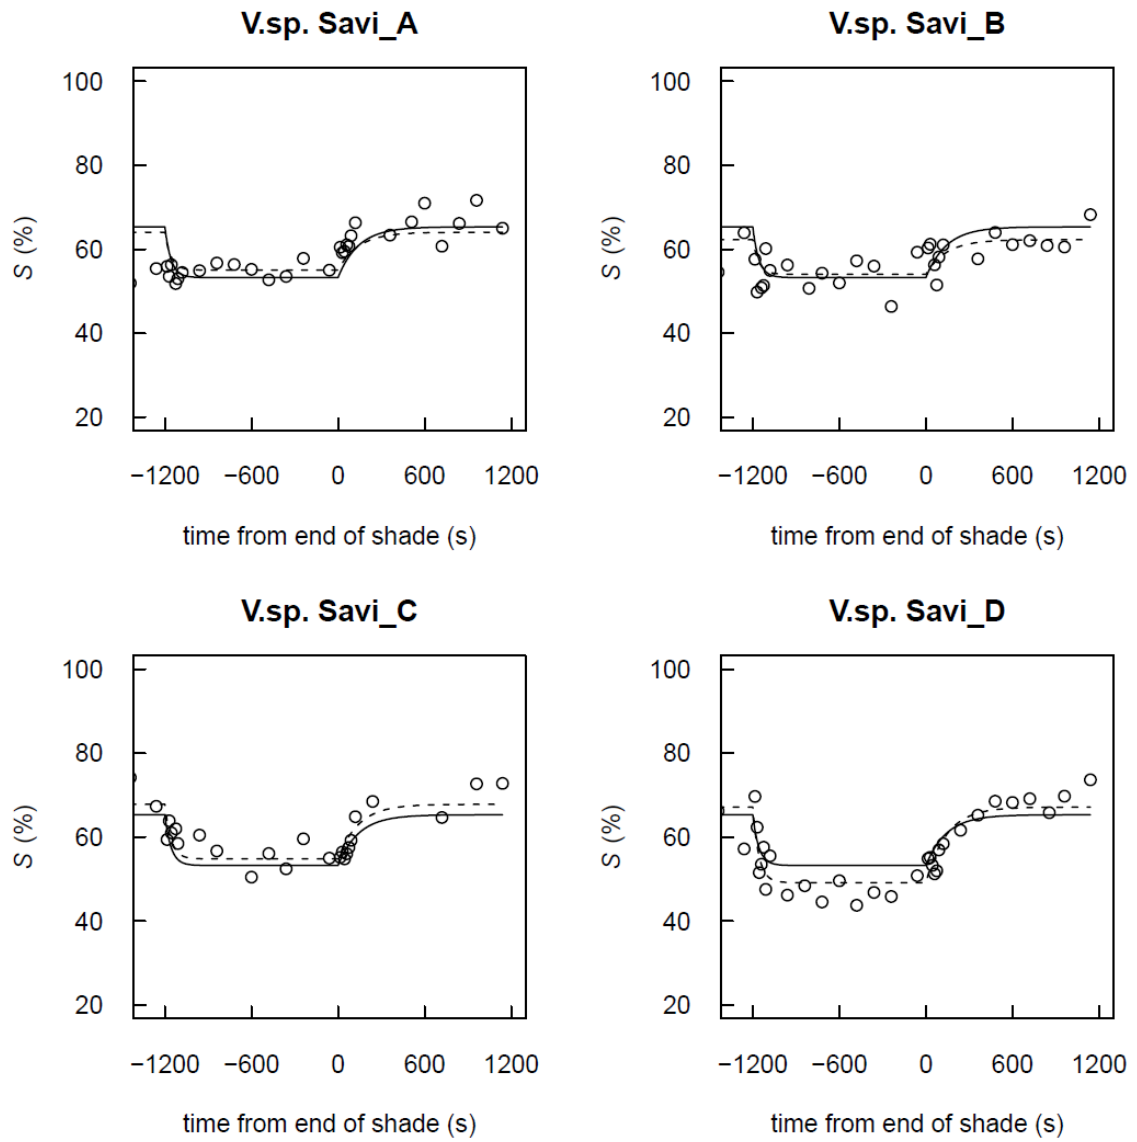

Fig. S9 continued.

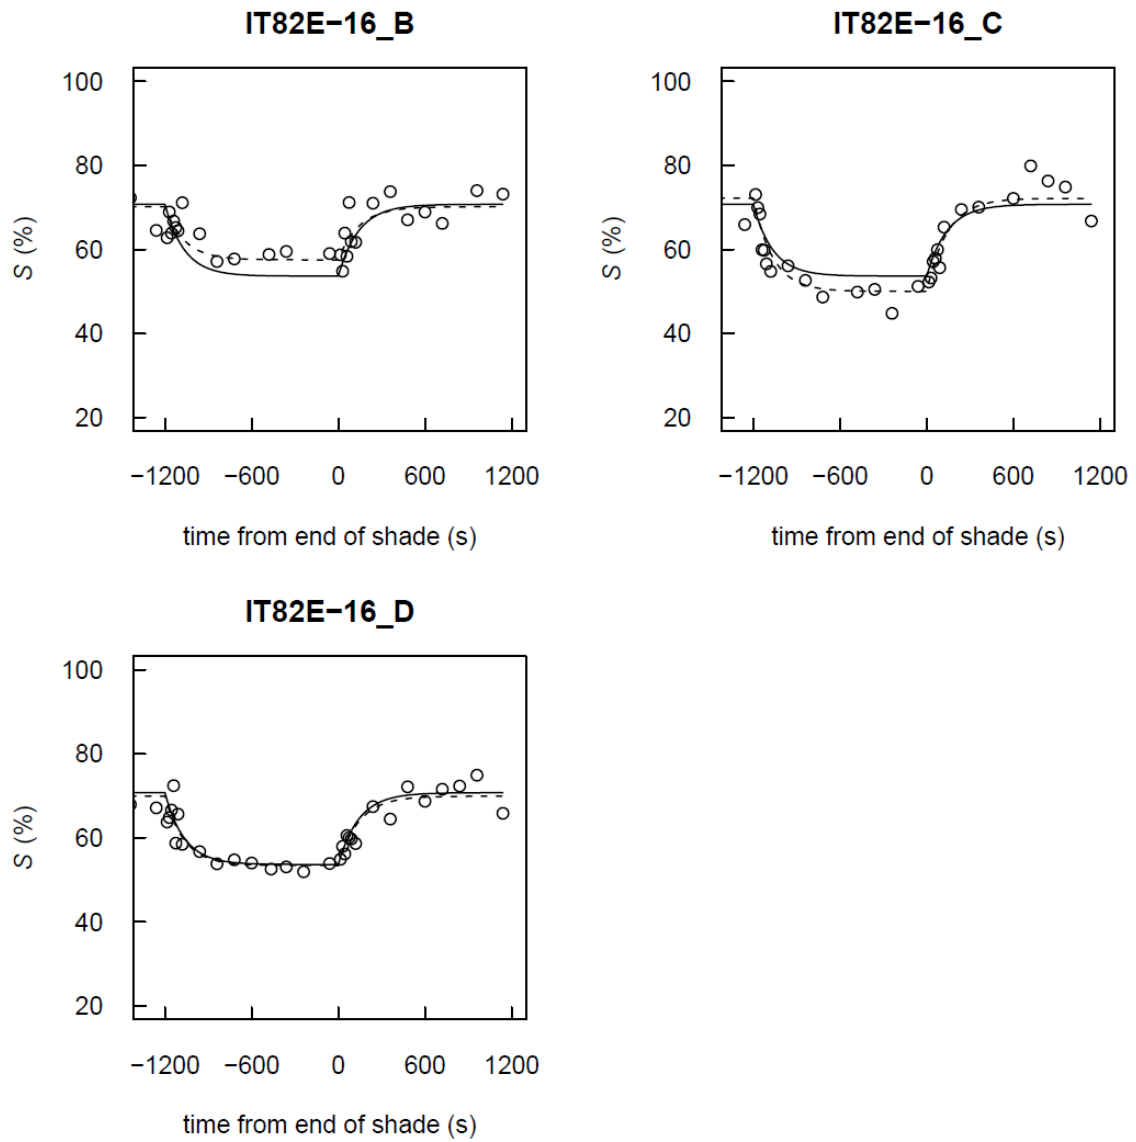

Fig. S9 continued.

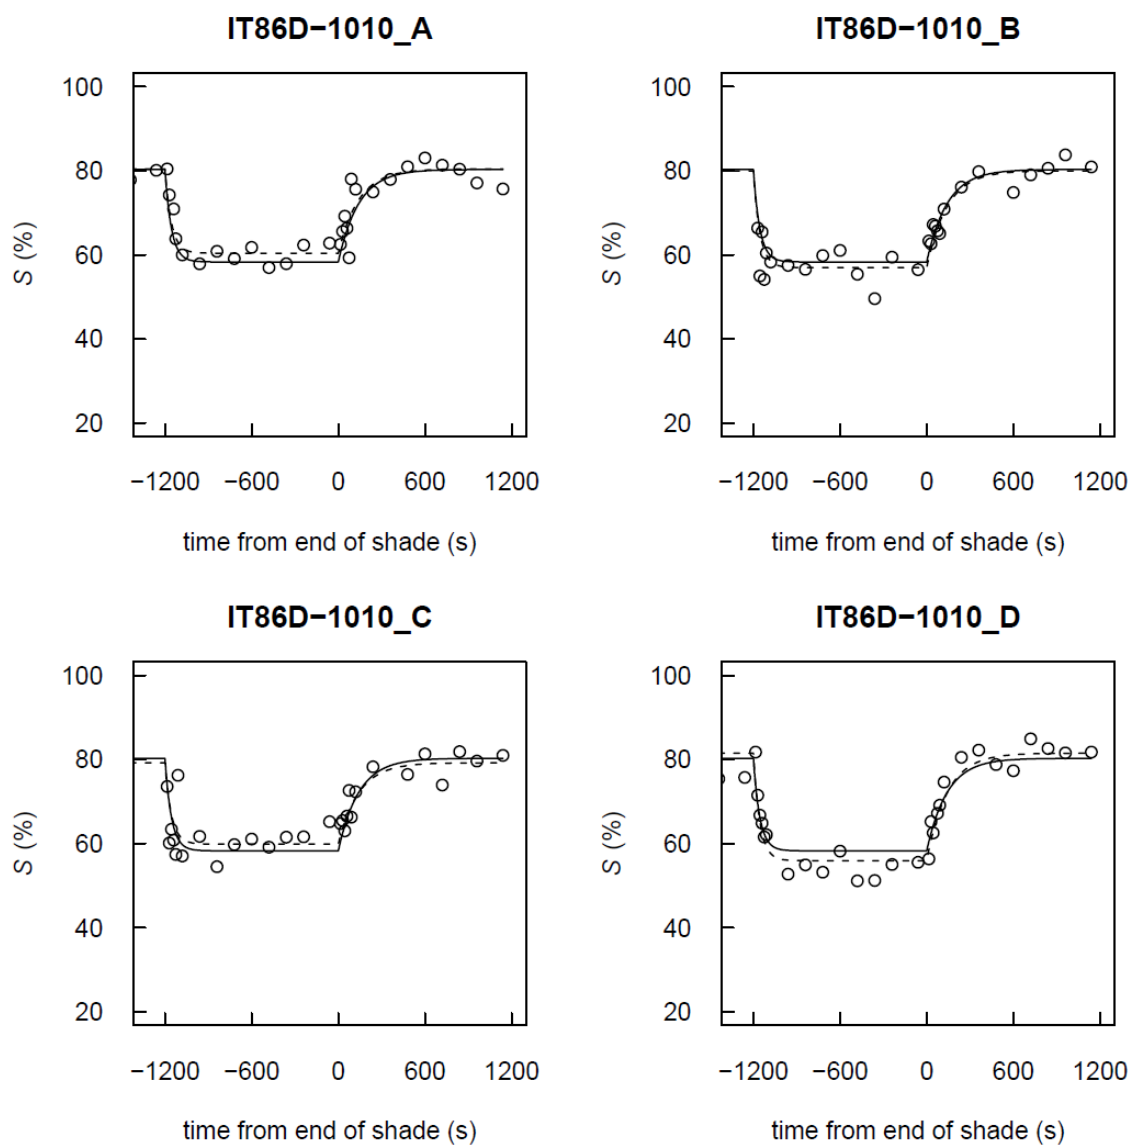



**Fig. S10. Induction (shade-sun) responses for one-point  $V_{c,max}$**

Individual replicates are plotted, with overlaid best-fit models at the levels of: genotypes, solid lines; individuals, dashed lines. Individuals coded as in Table S2. Extrapolations show predictions from the end of shade through to 10 min induction.

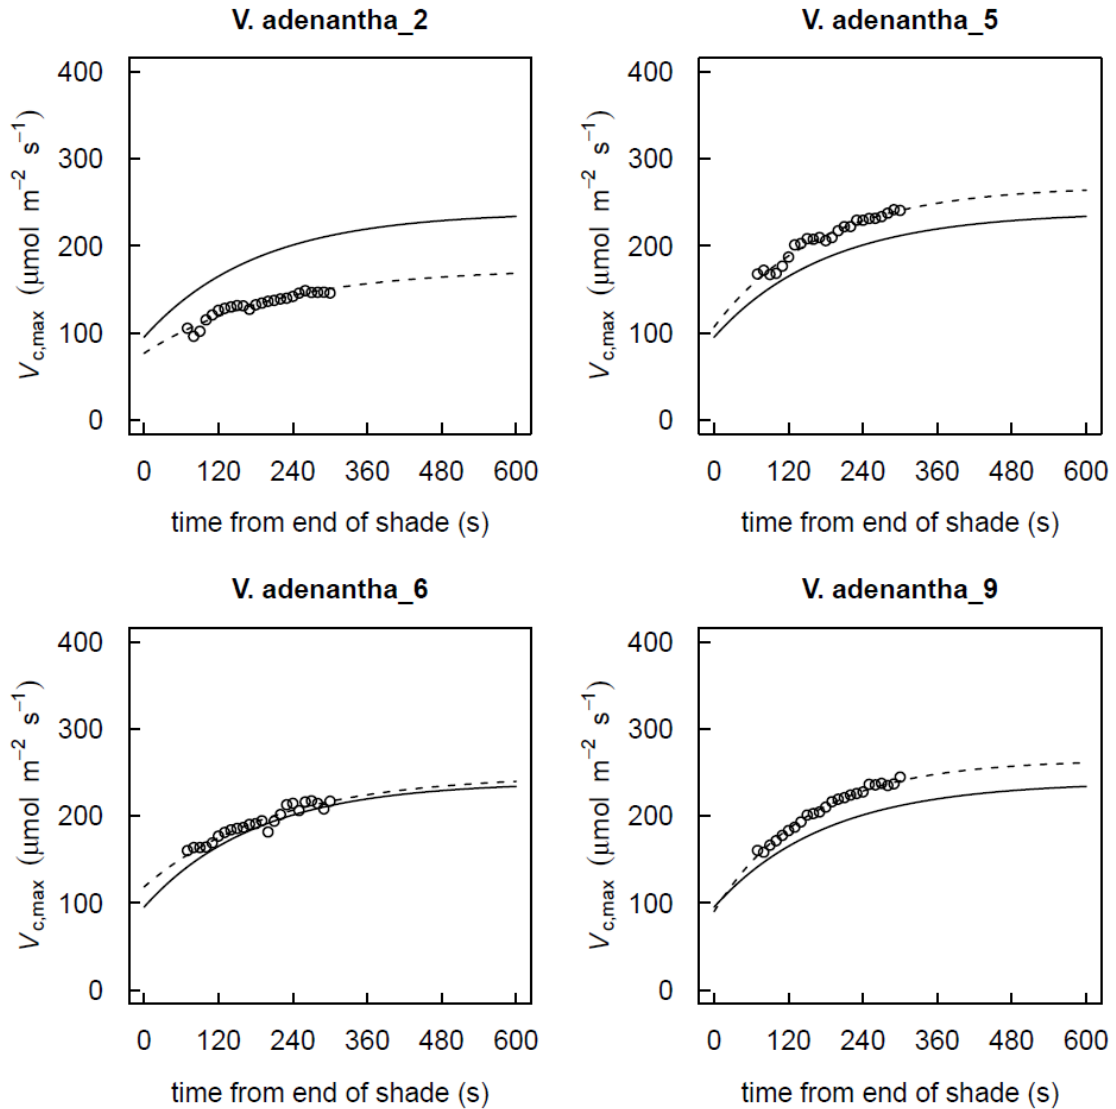

Fig. S10 continued.

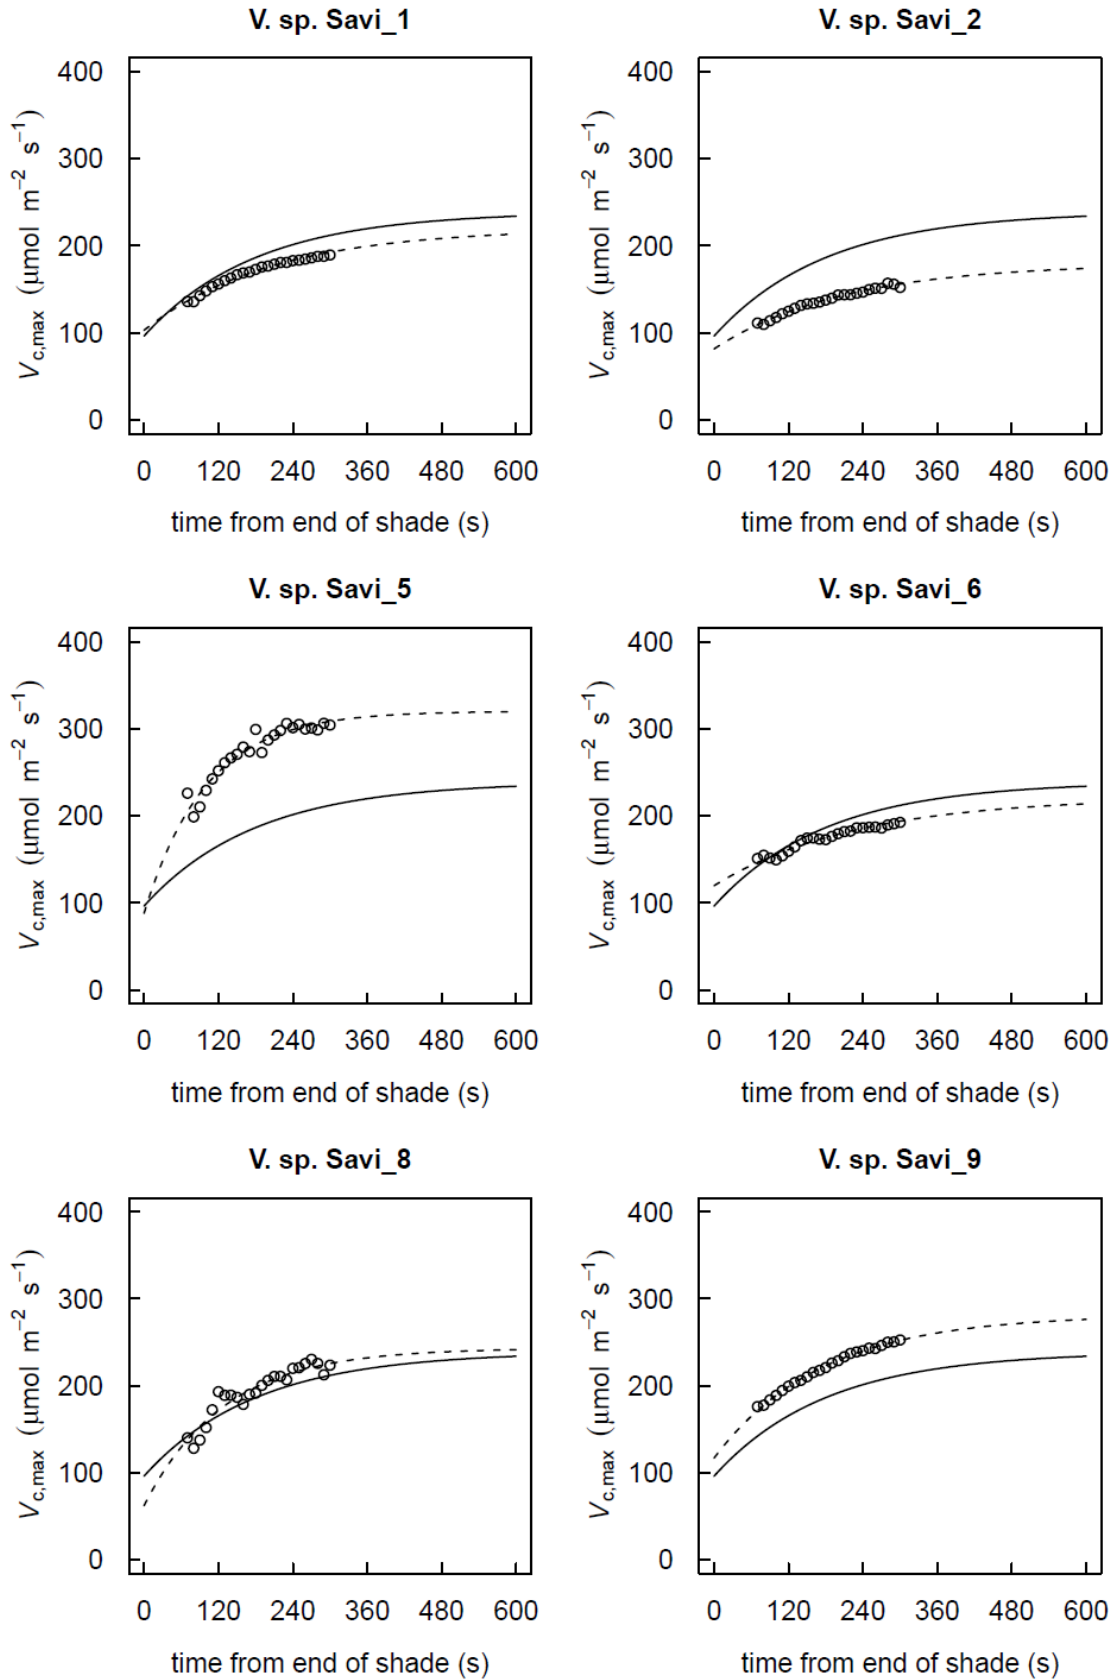

Fig. S10 continued.

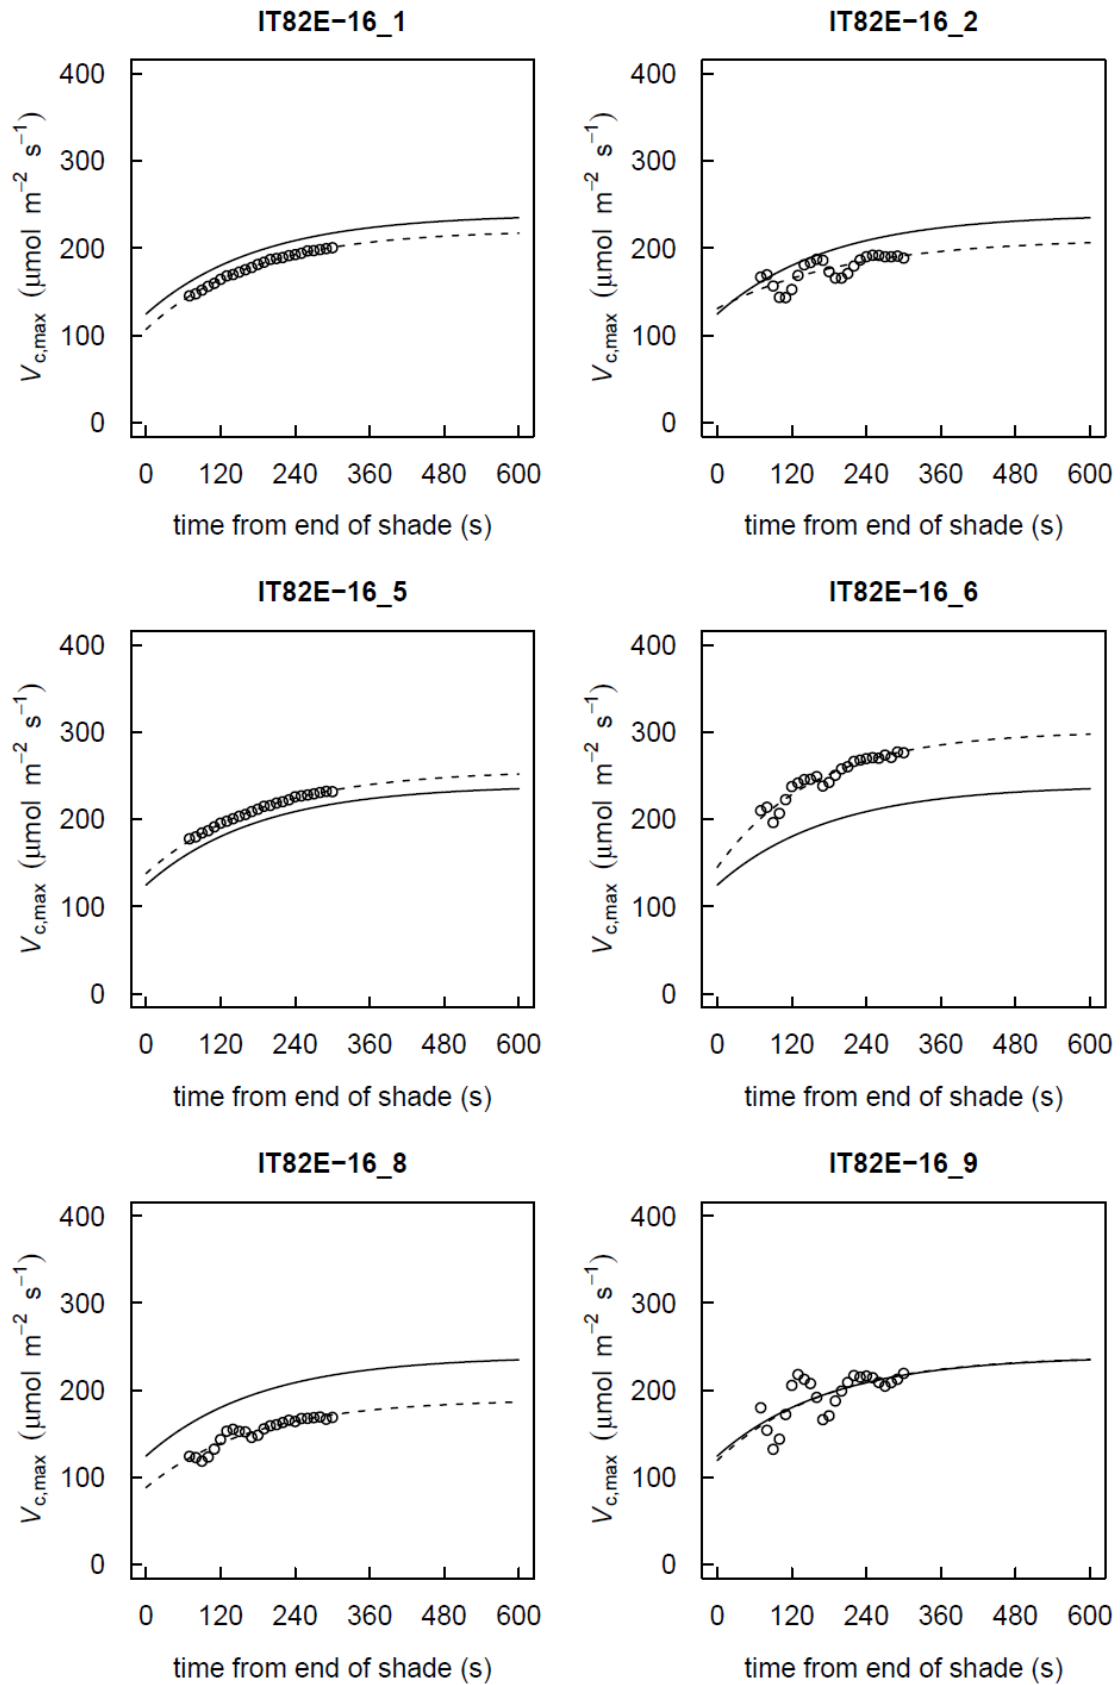

Fig. S10 continued.

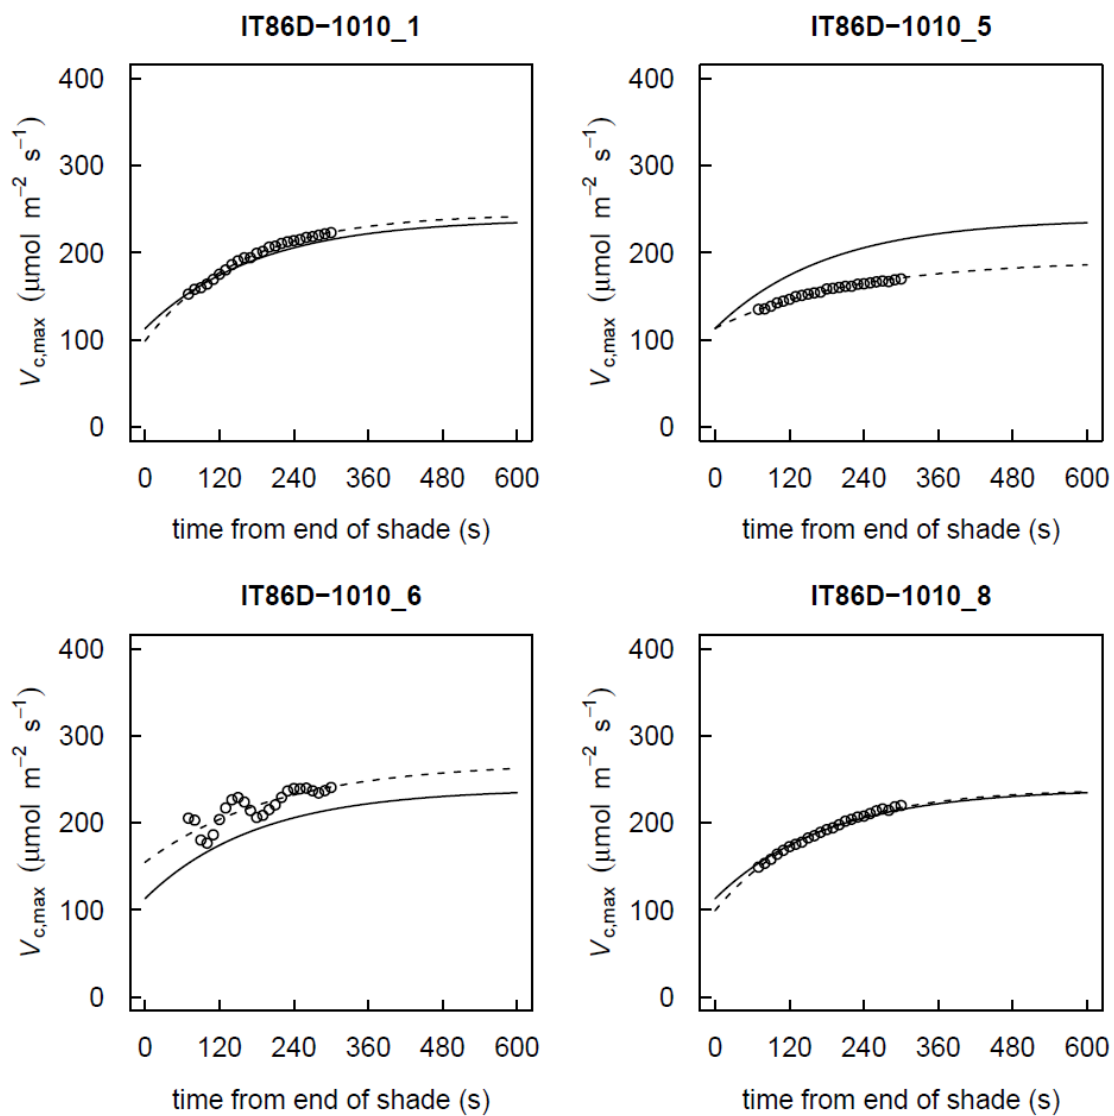

**Fig. S11. A/PPFD responses**

Individual replicates are plotted, with overlaid best-fit models at the levels of: genotypes, solid lines; individuals, dashed lines. Individuals coded as in Table S3.

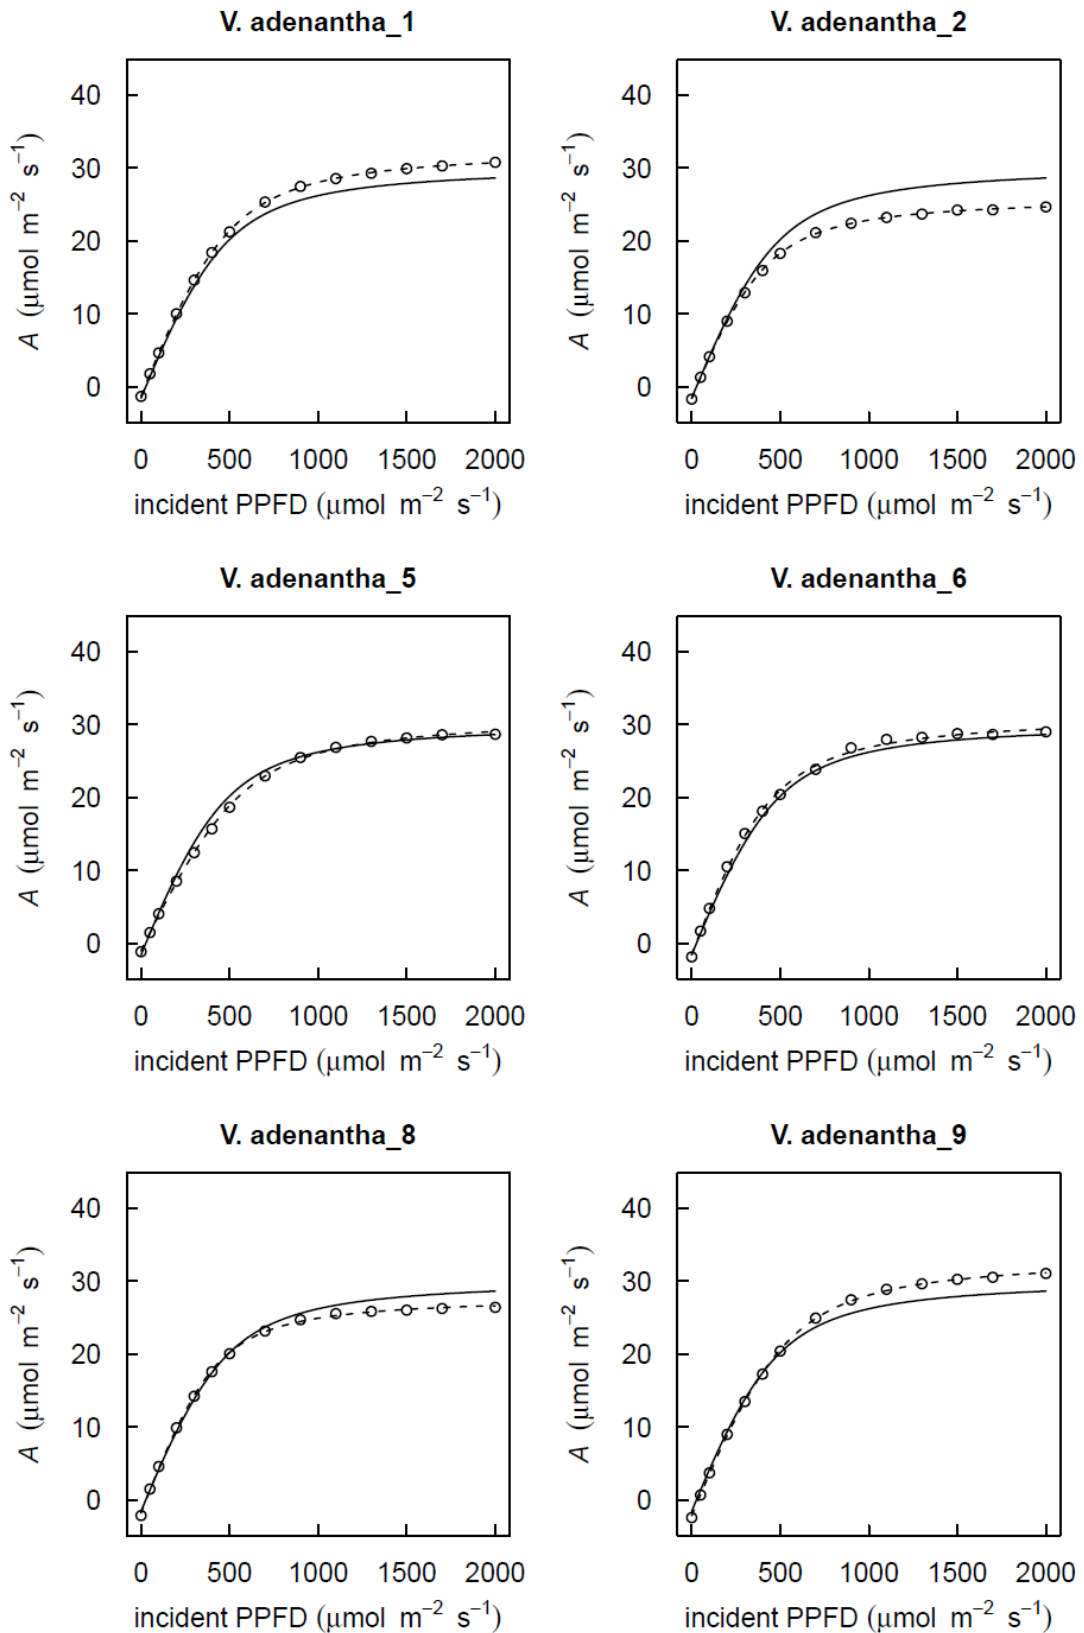

Fig. S11 continued.

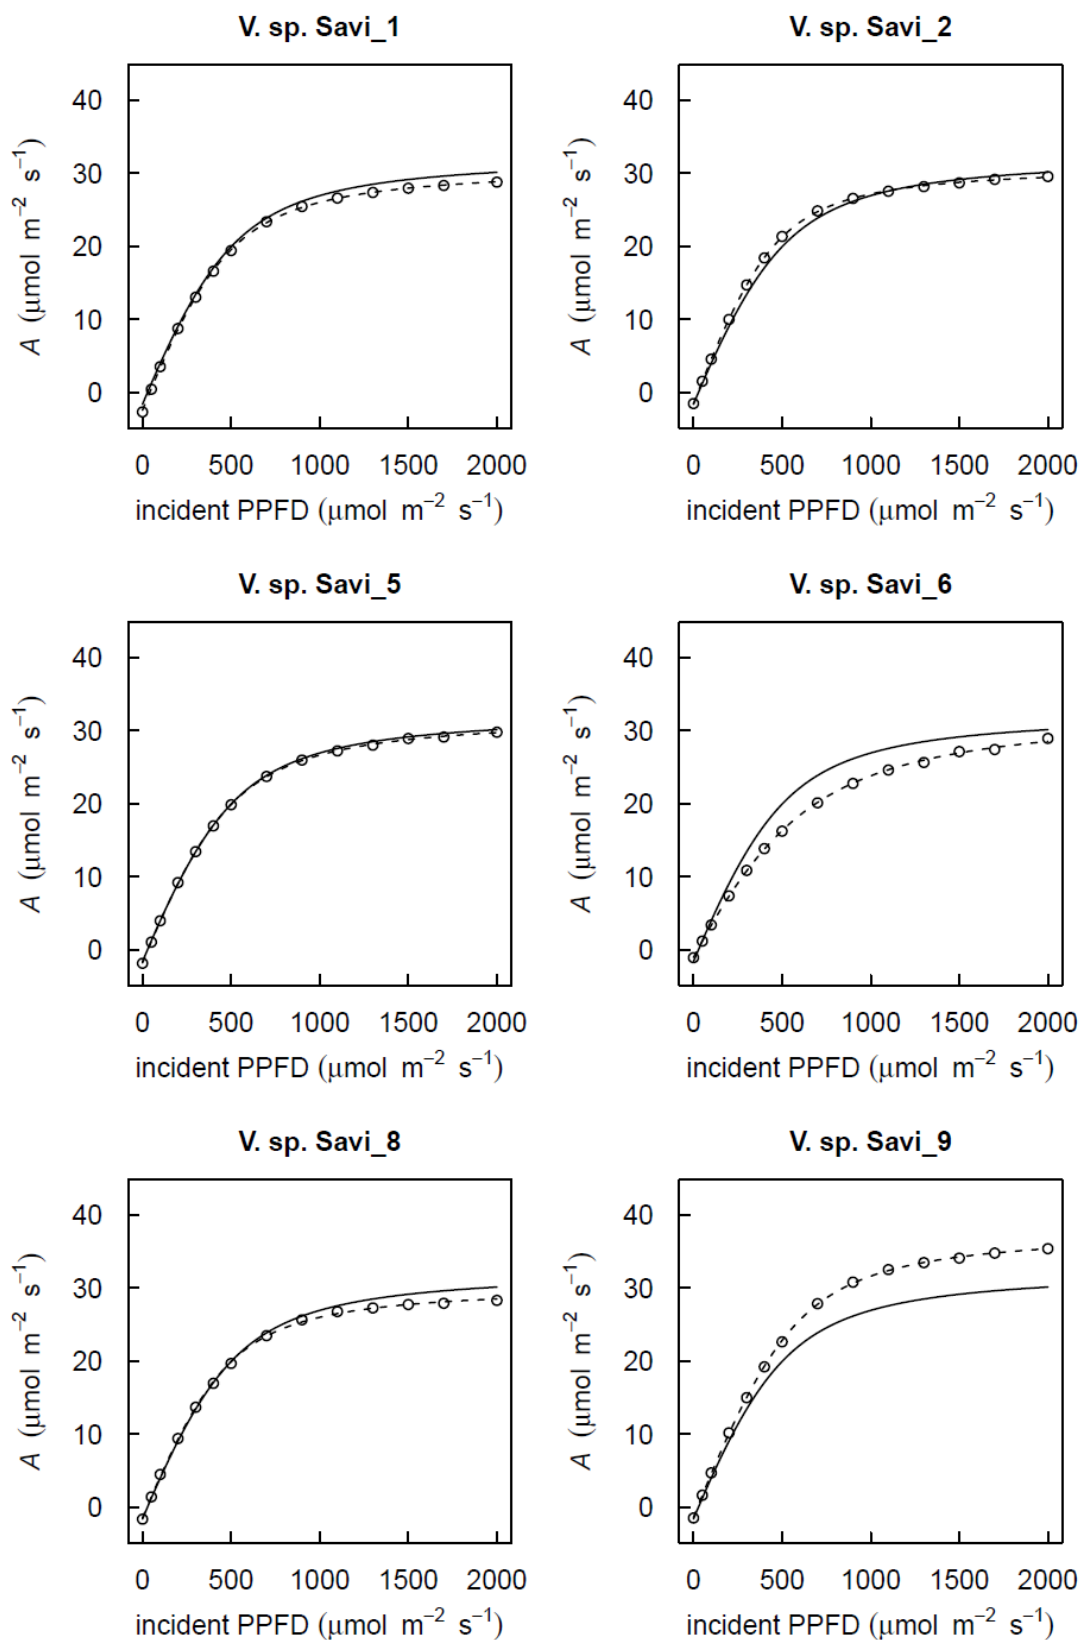

Fig. S11 continued.

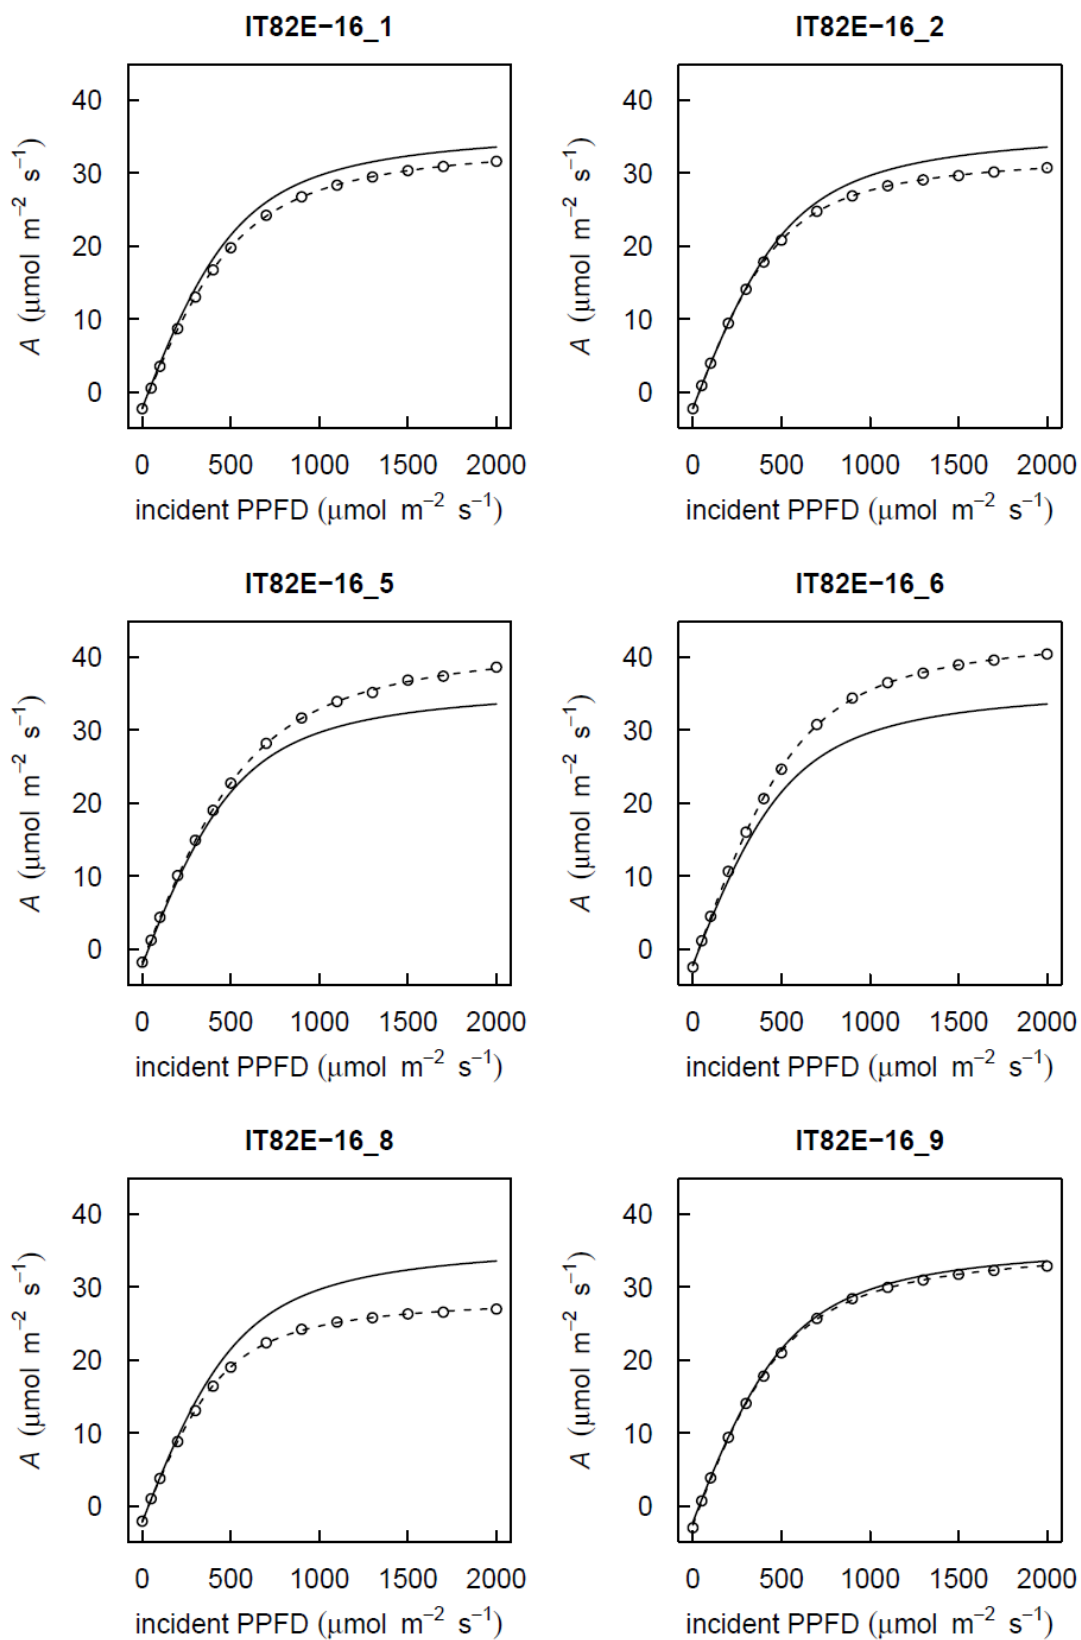

Fig. S11 continued.

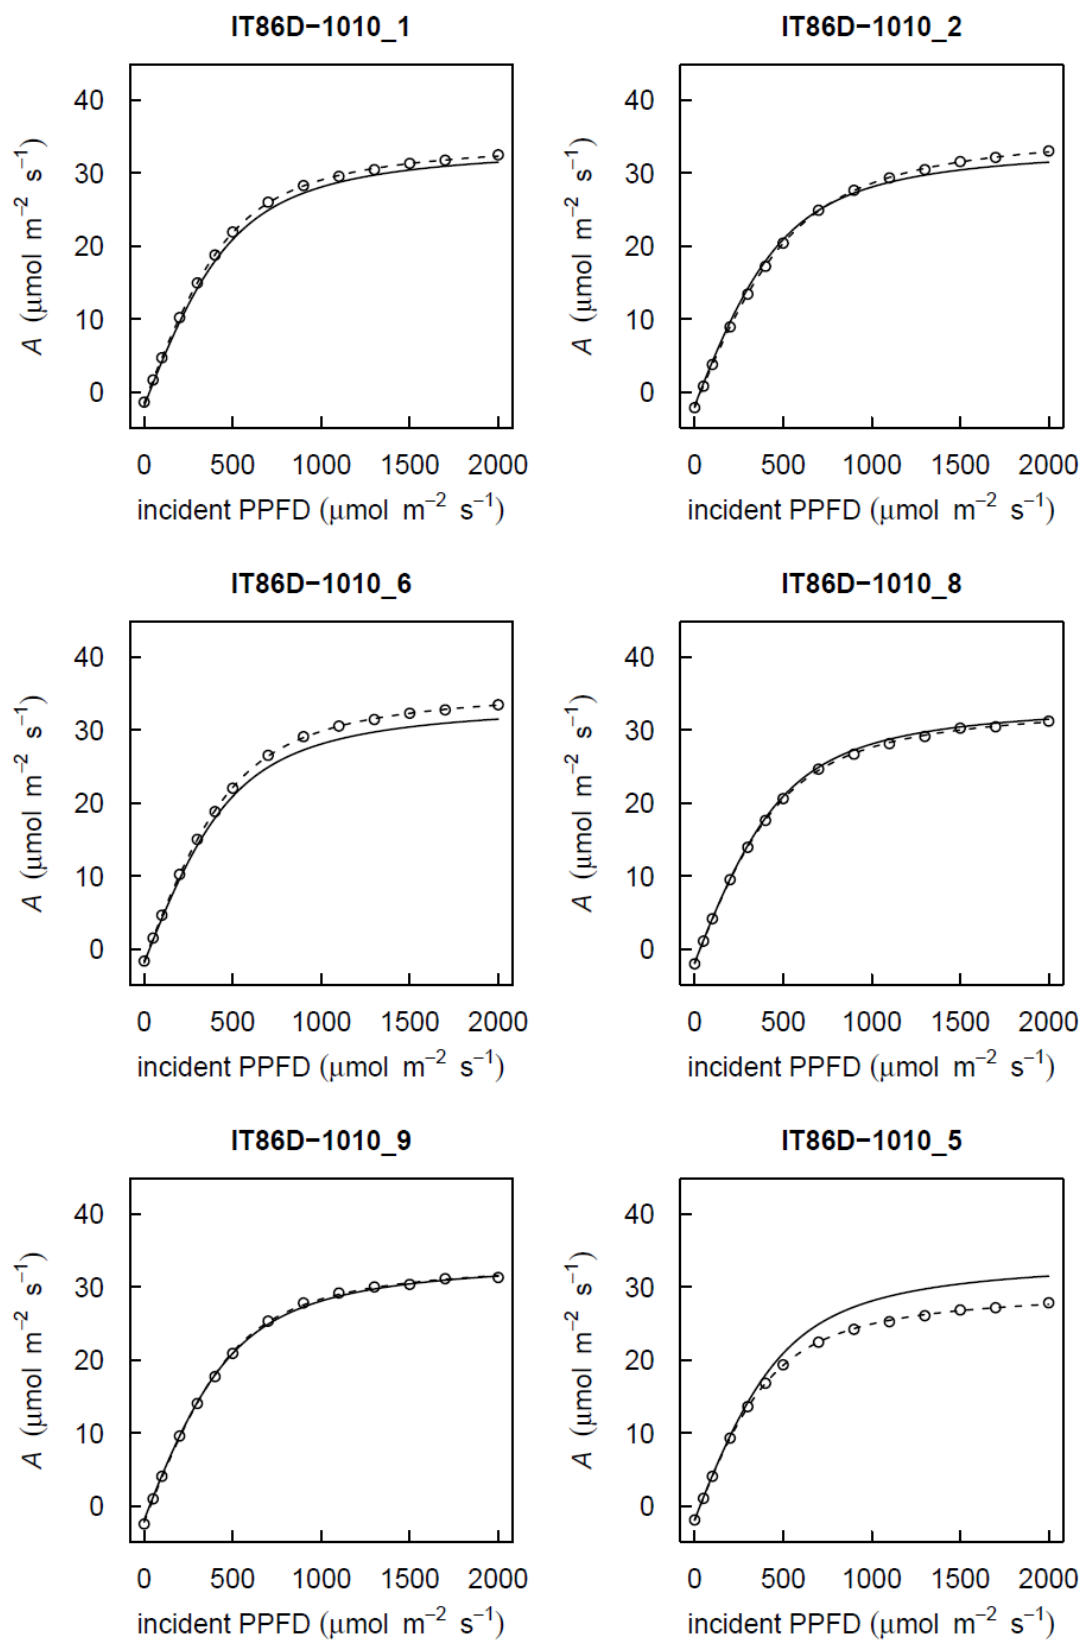



## References

- 1 Long, S. P. & Hallgren, J.-E. Measurement of CO<sub>2</sub> assimilation by plants in the field and the laboratory. in *Photosynthesis and Production in a Changing Environment: a field and laboratory manual* (eds. Hall, D. O., Scurlock, J. M. O., Bolhàr-Nordenkamp, H. R., Leegood, R. C. & Long, S. P.) 62–94, doi:10.1016/B978-0-08-031999-5.50016-9 (1993).
- 2 Marshall, B. & Biscoe, P. V. A model for C<sub>3</sub> leaves describing the dependence of net photosynthesis on irradiance. *J. Exp. Bot.* **31**, 29–39 (1980).
- 3 R Core Team. R: A language and environment for statistical computing. R Foundation for Statistical Computing, Vienna, Austria. URL <https://www.R-project.org/>. (2020).
- 4 Von Caemmerer, S. & Farquhar, G. D. Some relationships between the biochemistry of photosynthesis and the gas exchange of leaves. *Planta* **153**, 376–387 (1981).
- 5 Farquhar, G. D., von Caemmerer, S. & Berry, J. A. A Biochemical Model of Photosynthetic CO<sub>2</sub> Assimilation in Leaves of C<sub>3</sub> Species. *Planta* **149**, 78–90 (1980).
- 6 Gu, L., Pallardy, S. G., Tu, K., Law, B. E. & Wullschlegel, S. D. Reliable estimation of biochemical parameters from C<sub>3</sub> leaf photosynthesis-intercellular carbon dioxide response curves. *Plant, Cell Environ.* **33**, 1852–1874 (2010).
- 7 Taylor, S. H., Orr, D. J., Carmo-Silva, E. & Long, S. P. During photosynthetic induction, biochemical and stomatal limitations differ between Brassica crops. *Plant Cell Environ.* **43**, 2623–2636, doi:10.1111/pce.13862 (2020).
- 8 Sharkey, T. D., Bernacchi, C. J., Farquhar, G. D. & Singaas, E. L. Fitting photosynthetic carbon dioxide response curves for C<sub>3</sub> leaves. *Plant, Cell Environ.* **30**, 1035–40 (2007).
- 9 Busch, F. A. & Sage, R. F. The sensitivity of photosynthesis to O<sub>2</sub> and CO<sub>2</sub> concentration identifies strong Rubisco control above the thermal optimum. *New Phytol.* **213**, 1036–1051 (2017).
